# Supplementary material
Source: MDPI journal article supplement (https://www.mdpi.com/2673-4176/3/2/21)
Supplement: s1 [file s1]

## **Supporting Information**

### **Removal of Iron, Manganese, Cadmium, and Nickel Ions Using Brewers' Spent Grain**

**Karina Haro Carrasco, Egon Götz Höfgen, Dominik Brunner, Konstantin B. L. Borchert, Berthold Reis, Christine Steinbach, Martin Mayer, Simona Schwarz, Karl Glas and Dana Schwarz**

## Table of content

|        |                                                                                          |    |
|--------|------------------------------------------------------------------------------------------|----|
| 1      | Results .....                                                                            | 4  |
| 1.1    | Characterization of BSG .....                                                            | 4  |
| 1.1.1  | Gas sorption analysis.....                                                               | 4  |
| 1.1.2  | Charge Density .....                                                                     | 6  |
| 1.1.3  | Moisture analysis .....                                                                  | 7  |
| 1.1.4  | ICP-OES analysis of elemental composition of BSG .....                                   | 8  |
| 1.1.5  | SEM-EDX analysis of BSG prior adsorption .....                                           | 9  |
| 1.2    | Adsorption experiments.....                                                              | 14 |
| 1.2.1  | Kinetic adsorption experiments .....                                                     | 14 |
| 1.2.2  | Sorption of $\text{FeSO}_4$ and $\text{MnSO}_4$ .....                                    | 15 |
| 1.2.3  | pH values of the batch sorption experiments for $\text{FeSO}_4$ and $\text{MnSO}_4$ .... | 15 |
| 1.2.4  | Sorption isotherms of $\text{FeSO}_4$ with different fitting models .....                | 16 |
| 1.2.5  | Sorption isotherms of $\text{MnSO}_4$ with different fitting models .....                | 17 |
| 1.2.6  | Comparison of isotherm model fitting.....                                                | 18 |
| 1.2.7  | SEM-EDX Analysis of BSG after adsorption of iron ions .....                              | 19 |
| 1.2.8  | SEM-EDX Analysis of BSG after adsorption of manganese ions.....                          | 22 |
| 1.2.9  | Adsorption with real water samples .....                                                 | 25 |
| 1.2.10 | Adsorption with $\text{NiSO}_4$ .....                                                    | 26 |
| 1.2.11 | Adsorption with $\text{CdSO}_4$ .....                                                    | 31 |
| 2      | Literature comparison of adsorption capacities .....                                     | 36 |
| 2.1    | Literature comparison of adsorption capacities for iron ions.....                        | 36 |
| 2.2    | Literature comparison of adsorption capacities for manganese ions.....                   | 37 |
| 2.3    | Literatur comparison of adsorption capacities for nickel ions .....                      | 38 |
| 2.4    | Literatur comparison of adsorption capacities for cadmium ions .....                     | 39 |
| 3      | References .....                                                                         | 40 |

# 1 Results

## 1.1 Characterization of BSG

### 1.1.1 Gas sorption analysis

#### 1.1.1.1 Nitrogen sorption isotherms

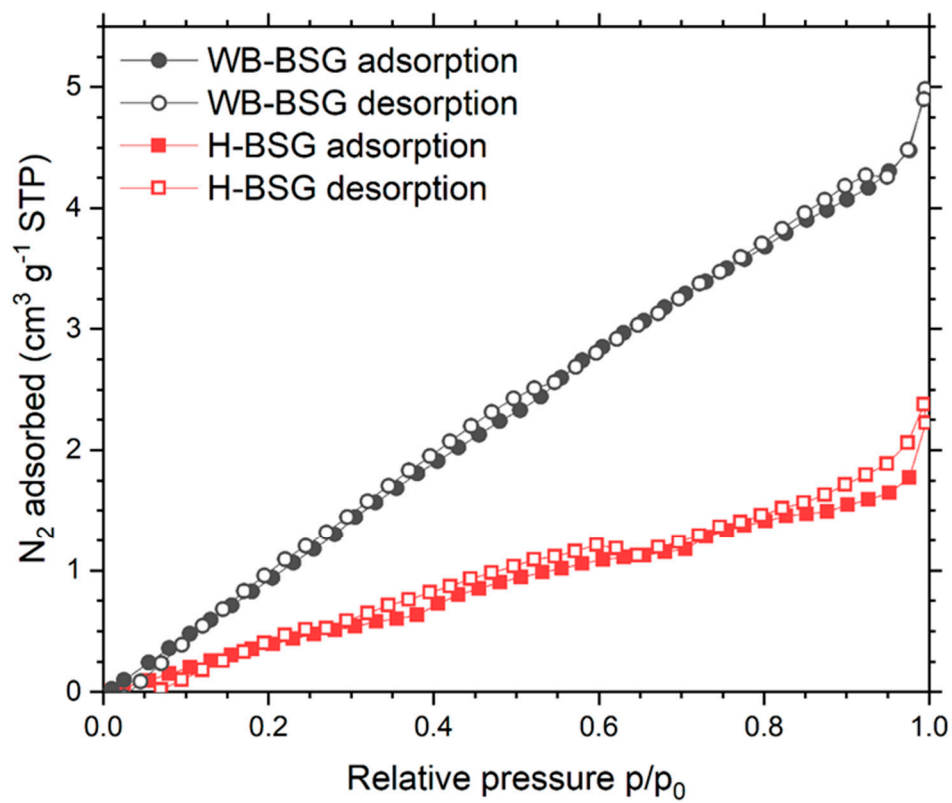

**Figure S1.** Nitrogen sorption isotherm at 77 K of WB-BSG (grey) and H-BSG (red), desorption denoted by hollow symbols.

### 1.1.1.2 Carbondioxide sorption isotherms

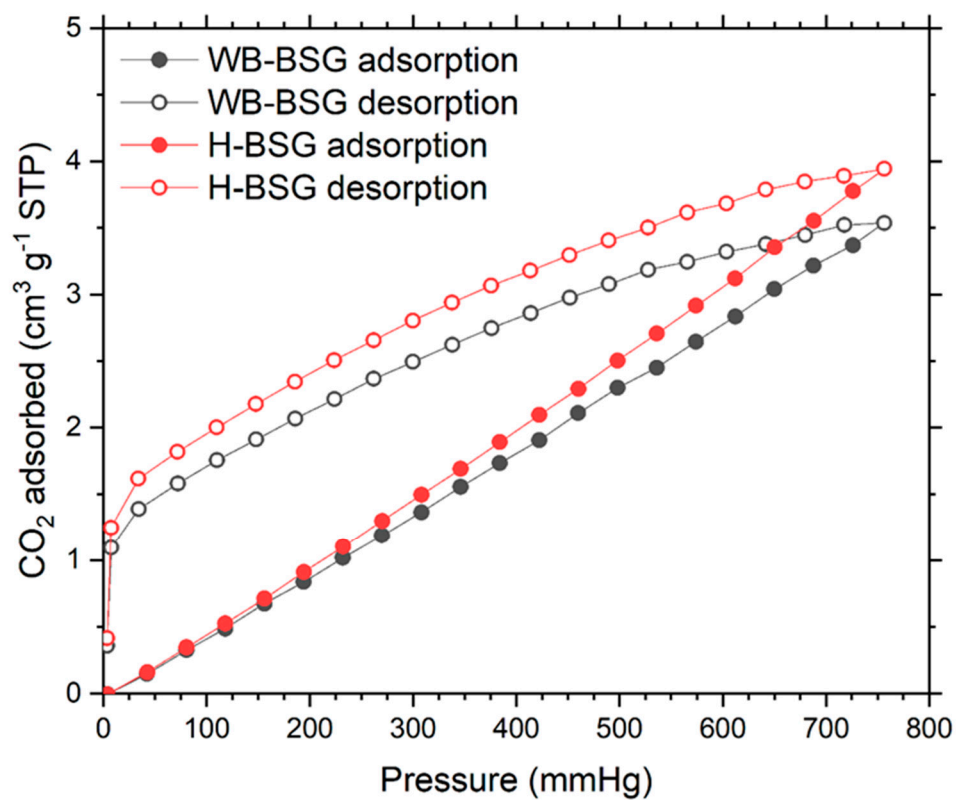

**Figure S2.** CO<sub>2</sub> sorption isotherm at 273 K of WB-BSG (grey) and H-BSG (red), desorption denoted by hollow symbols.

### 1.1.2 Charge Density

**Table S1.** Measurements of charge densities (q) at pH values 3, 5.5, and 7 of H-BSG and WB-BSG.  $V_{\text{used}}$  Volumes of Polyelectrolyte (poly(sodium ethylenesulfonate) (PES-Na) solution or poly(diallyldimethylammonium chloride) (PDADMAC)) used until point of zero charge.

| Sample        | Initial<br>$\text{pH}_0$ | mass (g) | Potential | $V_{\text{used}}$ (mL) | mean<br>$V_{\text{used}}$ (mL) | c (mmol/L) | q<br>( $\mu\text{eq/g}$ ) |
|---------------|--------------------------|----------|-----------|------------------------|--------------------------------|------------|---------------------------|
| <b>WB-BSG</b> | <b>3</b>                 | 0.1      | +         | 0.0526                 | 0.0543                         | (+) 0.005  | <b>(+) 0.54</b>           |
|               |                          | 0.1      | +         | 0.0559                 |                                |            |                           |
|               | <b>5.5</b>               | 0.1      | –         | 0.1082                 | 0.1089                         | (–) 0.011  | <b>(–) 1.09</b>           |
|               |                          | 0.1      | –         | 0.1096                 |                                |            |                           |
|               | <b>7</b>                 | 0.1      | –         | 0.2384                 | 0.2455                         | (–) 0.025  | <b>(–) 2.46</b>           |
|               |                          | 0.1      | –         | 0.2526                 |                                |            |                           |
| <b>H-BSG</b>  | <b>3</b>                 | 0.1      | +         | 0.0690                 | 0.0637                         | (+) 0.006  | <b>(+) 0.64</b>           |
|               |                          | 0.1      | +         | 0.0583                 |                                |            |                           |
|               | <b>5.5</b>               | 0.1      | –         | 0.4408                 | 0.4203                         | (–) 0.042  | <b>(–) 4.20</b>           |
|               |                          | 0.1      | –         | 0.3997                 |                                |            |                           |
|               | <b>7</b>                 | 0.1      | –         | 0.7444                 | 0.7671                         | (–) 0.077  | <b>(–) 7.67</b>           |
|               |                          | 0.1      | –         | 0.7898                 |                                |            |                           |

### 1.1.3 Moisture analysis

**Table S2.** Moisture analysis performed at 110 °C until mass was constant.

| <b>Sample</b> | <b>Moisture (%)</b> | <b>Solids content (%)</b> |
|---------------|---------------------|---------------------------|
| WB-BSG        | 2.82                | 97.18                     |
| H-BSG         | 1.08                | 98.92                     |

### 1.1.4 ICP-OES analysis of elemental composition of BSG

**Table S3.** Relative elemental content of BSG and comparison to literature.

| <b>Study</b>      | <b>This study</b>                 |                                  | <b>[1]</b>                         | <b>[2]</b>                               | <b>[3] *mean concentrations</b>       |
|-------------------|-----------------------------------|----------------------------------|------------------------------------|------------------------------------------|---------------------------------------|
| <b>Method</b>     | <b>ICP- OES</b>                   |                                  | <b>ICP-OES</b>                     | <b>XRF</b>                               | <b>ICP-AAS</b>                        |
| <b>Sample</b>     | <b>WB-BSG, industrial brewery</b> | <b>H-BSG, industrial brewery</b> | <b>Pilsner BSG, craft brewery,</b> | <b>BSG, industrial brewery</b>           | <b>fresh BSG, Carlsberg Malaysia,</b> |
| <b>Cu (mg/kg)</b> | 19.33                             | 37.98                            | -                                  | -                                        | 2.5*                                  |
| <b>Mn (mg/kg)</b> | 95.89                             | 33.27                            | 41                                 | 44.4 (as MnO <sub>2</sub> )              | 9.5*                                  |
| <b>Zn (mg/kg)</b> | 103                               | 77.21                            | 139                                | 107 (as ZnO)                             | -                                     |
| <b>Fe (mg/kg)</b> | 166                               | 121                              | 240                                | 217 (as Fe <sub>2</sub> O <sub>3</sub> ) | 63.5*                                 |
| <b>Si (mg/kg)</b> | 392                               | 530                              | 791                                | -                                        | 242*                                  |
| <b>K (mg/kg)</b>  | 411                               | 321                              | 849                                | 247 (as K <sub>2</sub> O)                | -                                     |
| <b>Na (mg/kg)</b> | 707                               | 1373                             | 166                                | 103 (as Na <sub>2</sub> O)               | 60.5*                                 |
| <b>S (mg/kg)</b>  | 2265                              | 2640                             | -                                  | -                                        | 8.5*                                  |
| <b>Mg (mg/kg)</b> | 2456                              | 1921                             | 2509                               | 122 (as MgO)                             | 688*                                  |
| <b>Ca (mg/kg)</b> | 4939                              | 2821                             | 2669                               | 595 (as CaO)                             | 1038*                                 |
| <b>P (mg/kg)</b>  | 6793                              | 4703                             | 5861                               | -                                        | 1977*                                 |
| <b>Se (mg/kg)</b> | n.a.                              | n.a.                             | -                                  | -                                        | 6*                                    |

### 1.1.5 SEM-EDX analysis of BSG prior adsorption

#### 1.1.5.1 SEM-EDX analysis of H-BSG

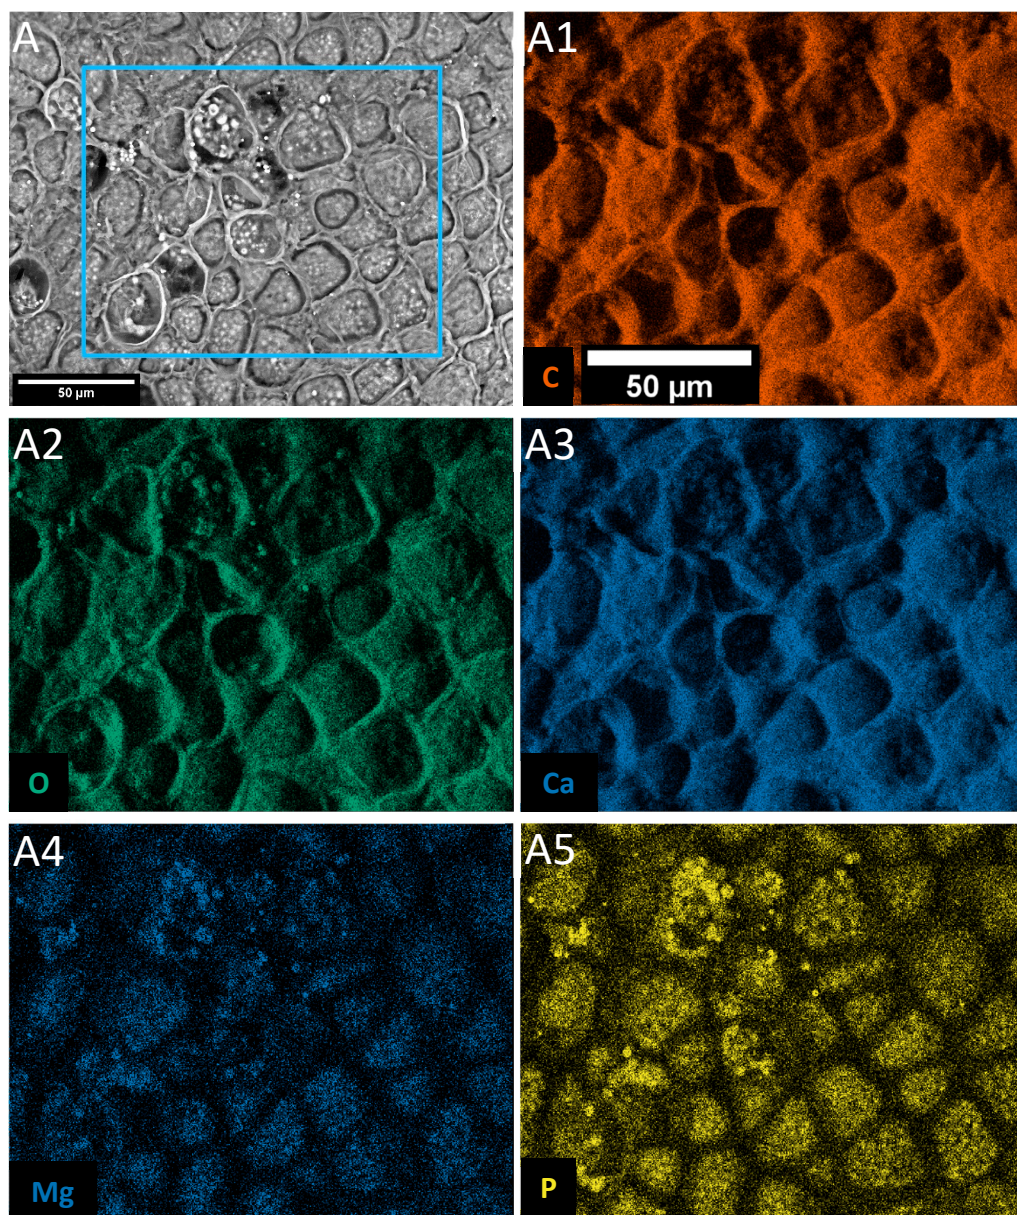

**Figure S3.** H-BSG Map A prior adsorption SEM-EDX elemental mapping, all scale bars = 50 μm. Subfigure A SEM micrograph with mapped area (Map A) highlighted as blue rectangles. Subfigures: A1 carbon mapping; A2 Oxygen mapping; A3 Calcium mapping; A4 Magnesium mapping; A5 Phosphorus mapping; data summarized in Table S4.

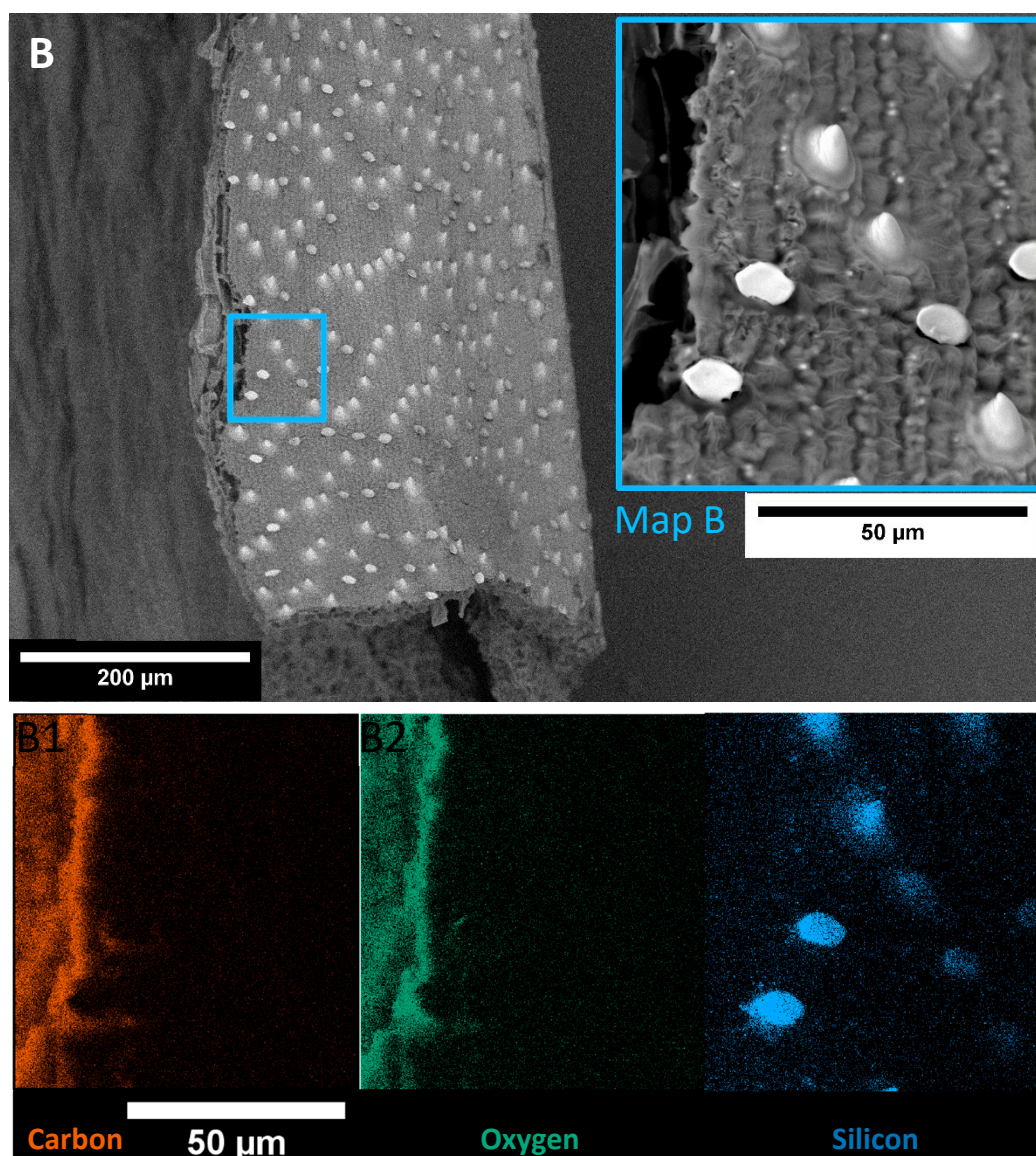

**Figure S4.** H-BSG Map B prior adsorption SEM-EDX analysis. Subfigure B showing SEM micrograph, area mapped as Map B highlighted as blue rectangles and magnified as insert. Subfigure B1 carbon mapping; subfigure B2 Oxygen mapping; subfigure B3 Silicon mapping; data summarized in Table S4.

**Table S4.** Elemental concentration as percentages detected in two areas of H-BSG prior adsorption. Selected areas are Map A of Figure S4 and Map B of Figure S5.

| <b>% atomic<br/>concentration</b> | <b>Map A<br/>Figure S4</b> | <b>Map B<br/>Figure S5</b> |
|-----------------------------------|----------------------------|----------------------------|
| Carbon                            | 68.611                     | 65.037                     |
| Oxygen                            | 29.526                     | 33.456                     |
| Silicon                           | -                          | 1.507                      |
| Phosphorous                       | 0.964                      | -                          |
| Calcium                           | 0.508                      | -                          |
| Magnesium                         | 0.391                      | -                          |
| <b>% weight<br/>concentration</b> | <b>Map A<br/>Figure S4</b> | <b>Map B<br/>Figure S5</b> |
| Carbon                            | 60.761                     | 57.487                     |
| Oxygen                            | 34.835                     | 39.397                     |
| Silicon                           | -                          | 3.116                      |
| Phosphorous                       | 2.202                      | -                          |
| Calcium                           | 1.502                      | -                          |
| Magnesium                         | 0.701                      | -                          |

### 1.1.5.2 SEM-EDX analysis of WB-BSG

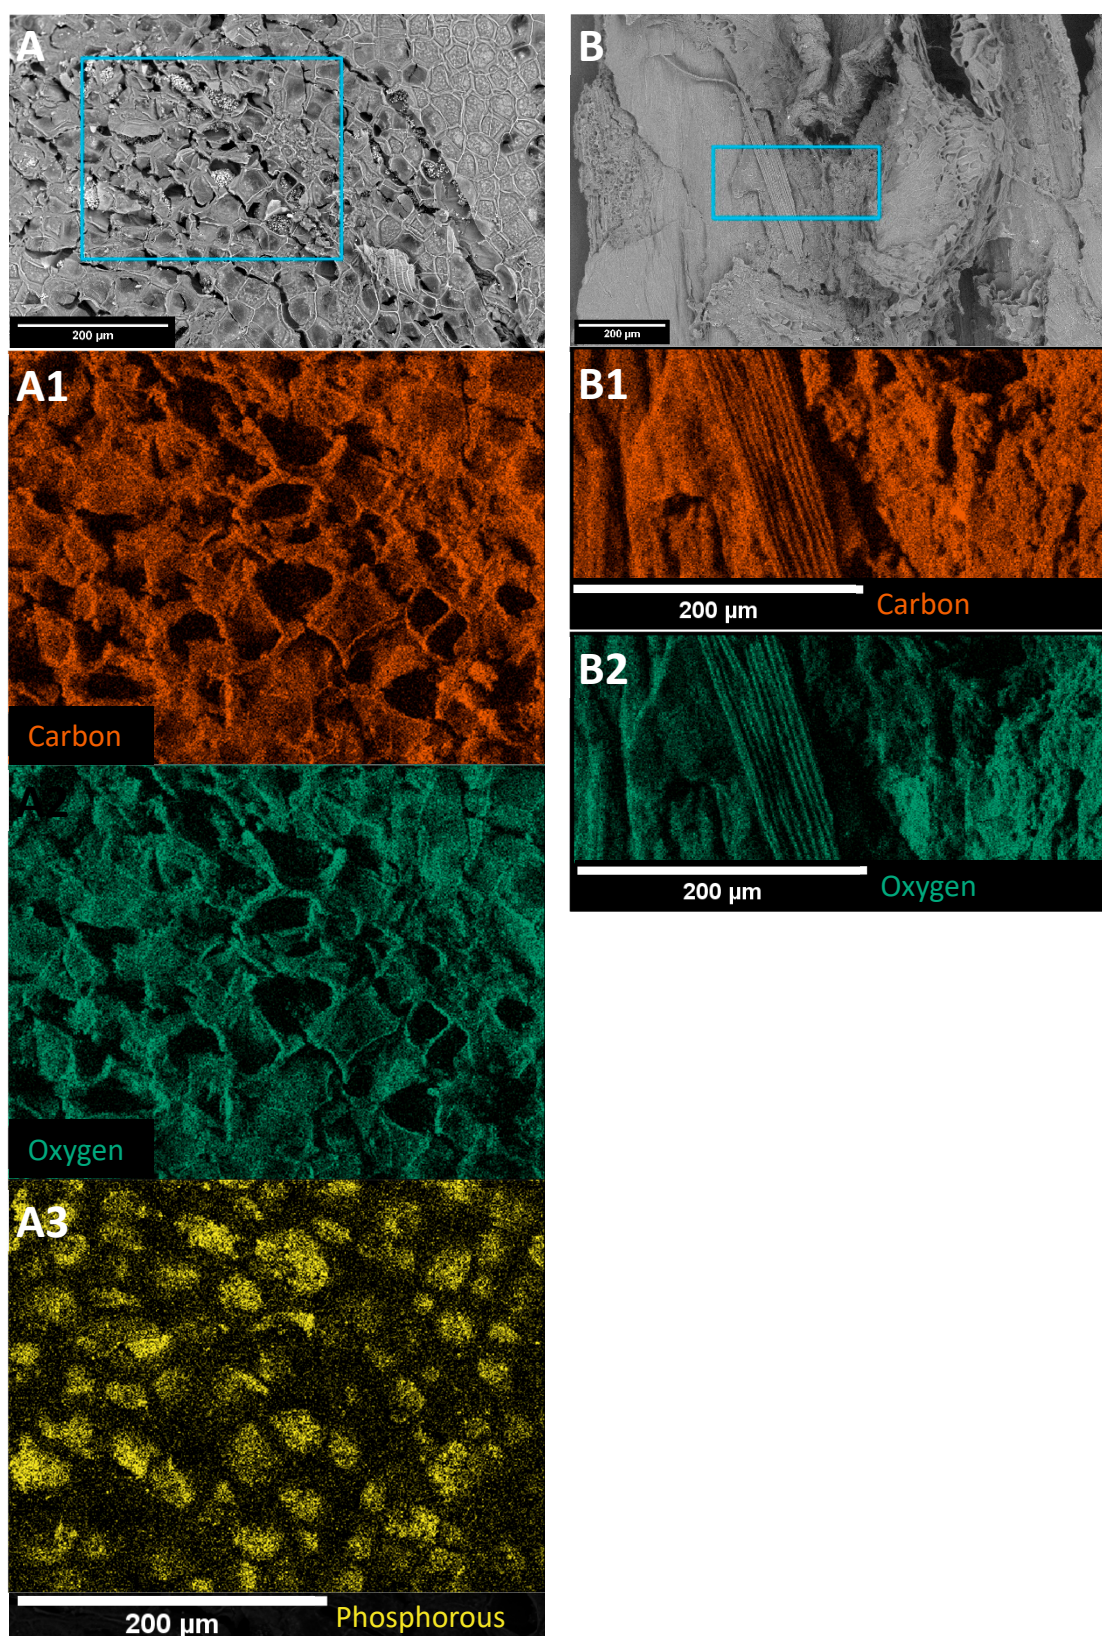

**Figure S5.** SEM-EDX elemental mapping of WB-BSG pre adsorption, all scale bars = 200 μm. Subfigures A and B are SEM micrographs, blue rectangles highlighted mapped areas Map A and Map B. Subfigure X1 carbon mapping; Subfigure X2 Oxygen mapping; Subfigure X3 Phosphorus mapping; data summarized in Table S5.

**Table S5.** Elemental concentration as percentages detected in two areas of WB-BSG prior adsorption. Selected areas Map A and B shown in Figure S6.

| <b>% atomic<br/>concentration</b> | <b>Map A</b> | <b>Map B</b> |
|-----------------------------------|--------------|--------------|
| Carbon                            | 58.557       | 60.916       |
| Oxygen                            | 39.401       | 39.084       |
| Phosphorous                       | 0.95         | -            |
| Calcium                           | 0.804        | -            |
| Magnesium                         | 0.288        | -            |
| <b>% weight<br/>concentration</b> | <b>Map A</b> | <b>Map B</b> |
| Carbon                            | 50.15        | 53.916       |
| Oxygen                            | 44.955       | 46.084       |
| Phosphorous                       | 2.098        | -            |
| Calcium                           | 2.298        | -            |
| Magnesium                         | 0.5          | -            |

## 1.2 Adsorption experiments

### 1.2.1 Kinetic adsorption experiments

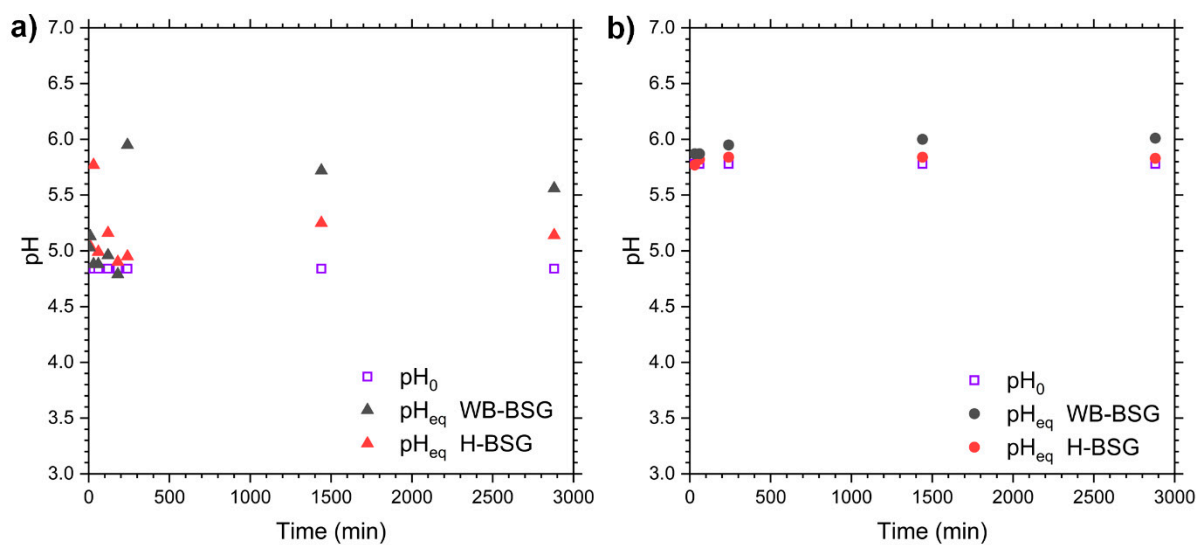

**Figure S6.** pH values before ( $\text{pH}_0$ ) and after ( $\text{pH}_{\text{eq}}$ ) adsorption in kinetic experiments with a)  $\text{FeSO}_4$  and b)  $\text{MnSO}_4$  solutions onto H-BSG and WB-BSG. From batch experiments with  $c_0 = 0.36 \text{ mmol/L Fe}^{2+/3+}$  or  $\text{Mn}^{2+}$ , a BSG dosage of  $3.33 \text{ g/L}$ , stirred at r.t. and measured at respective times.

**Table S6.** Parameters for linear fitting shown in Figure 6.

| Parameters<br>$f(x) = ax + C$ | $\text{Fe}^{2+/3+}$ |         | $\text{Mn}^{2+}$ |         |
|-------------------------------|---------------------|---------|------------------|---------|
|                               | H-BSG               | WB-BSG  | H-BSG            | WB-BSG  |
| Part I                        |                     |         |                  |         |
| a                             | 0.044               | 0.0372  | 0.0169           | 0.0116  |
| C                             | 0.0112              | 0.0158  | 0.0179           | 0.0275  |
| $R^2$                         | 0.93                | 0.95    | 0.92             | 0.67    |
| Part II                       |                     |         |                  |         |
| a                             | 0.00374             | 0.00467 | 0.00159          | 0.00535 |
| C                             | 0.0857              | 0.0812  | 0.0335           | 0.0353  |
| $R^2$                         | 0.38                | 0.36    | 0.77             | 0.93    |

### 1.2.2 Sorption of FeSO<sub>4</sub> and MnSO<sub>4</sub>

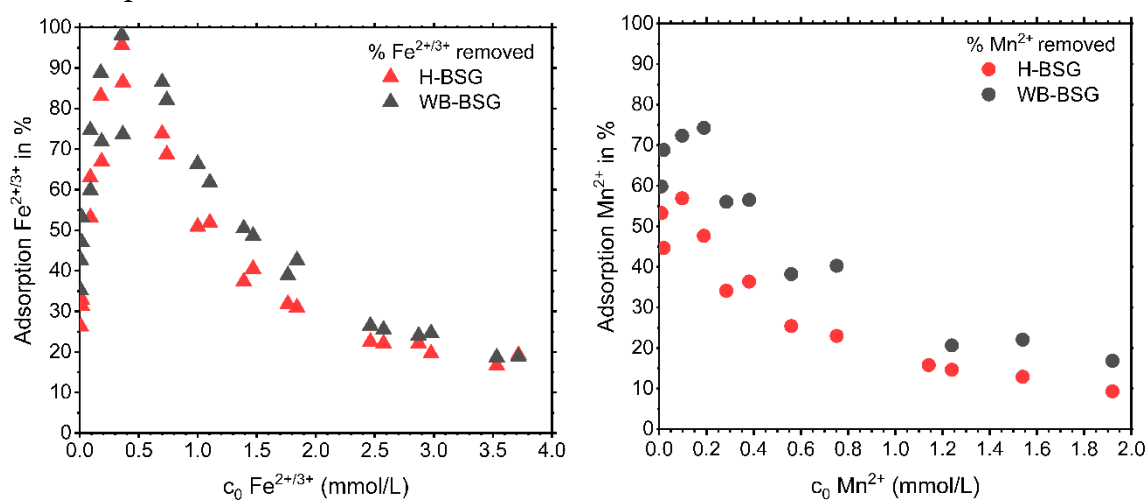

**Figure S7.** Removal rate for Fe<sup>2+/3+</sup> and Mn<sup>2+</sup> ions by adsorption onto H-BSG and WB-BSG, obtained from batch experiments with constant BSG dosage (3.33 g/L) and varying initial concentration of FeSO<sub>4</sub> or MnSO<sub>4</sub> for 24 h at r.t..

### 1.2.3 pH values of the batch sorption experiments for FeSO<sub>4</sub> and MnSO<sub>4</sub>

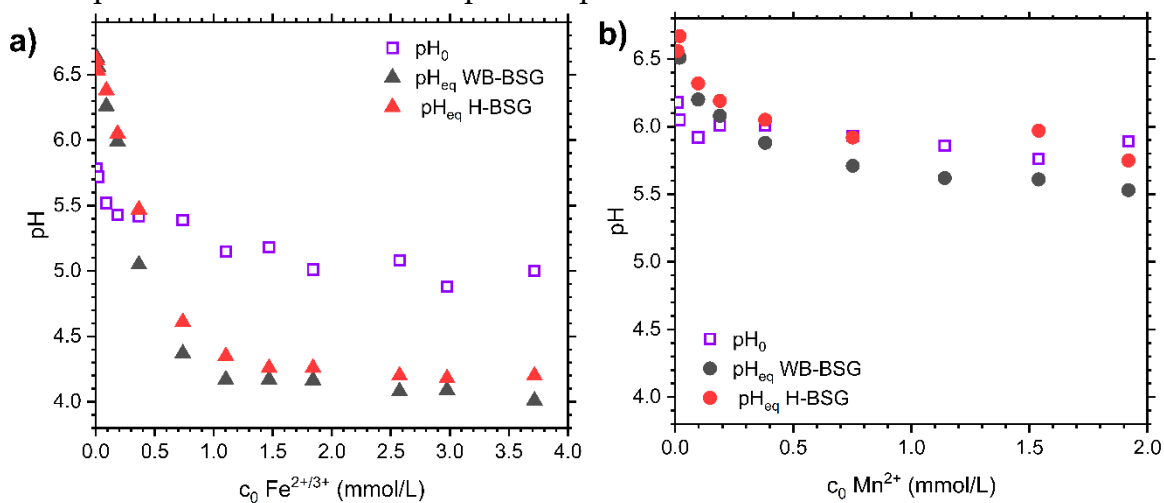

**Figure S8.** Changes of pH values throughout adsorption isotherm experiments with a) FeSO<sub>4</sub> and b) MnSO<sub>4</sub> solutions onto H-BSG and WB-BSG in batch experiments with constant dosage of adsorber material (3.33 g/L), varying initial concentrations FeSO<sub>4</sub>, pH not adjusted 24 h, r.t..

### 1.2.4 Sorption isotherms of $\text{FeSO}_4$ with different fitting models

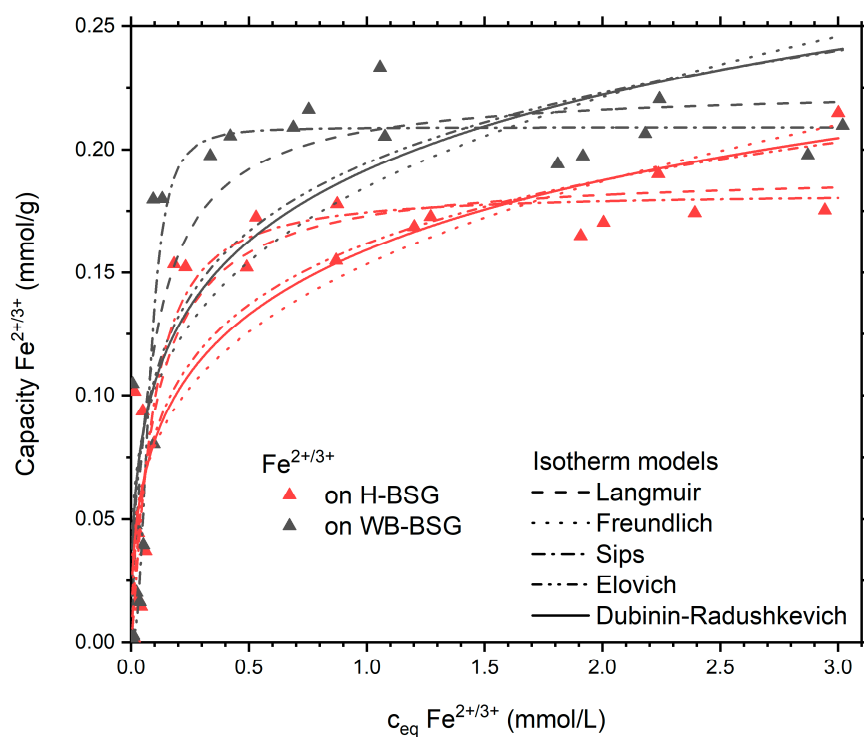

**Figure S9.** Curve fitting of different isotherm models onto  $\text{Fe}^{2+/3+}$  ion adsorption onto H-BSG and WB-BSG in batch experiment with constant dosage of adsorber material (3.33 g/L), varying initial concentrations  $\text{FeSO}_4$ , pH not adjusted 24 h, r.t..

### 1.2.5 Sorption isotherms of $\text{MnSO}_4$ with different fitting models

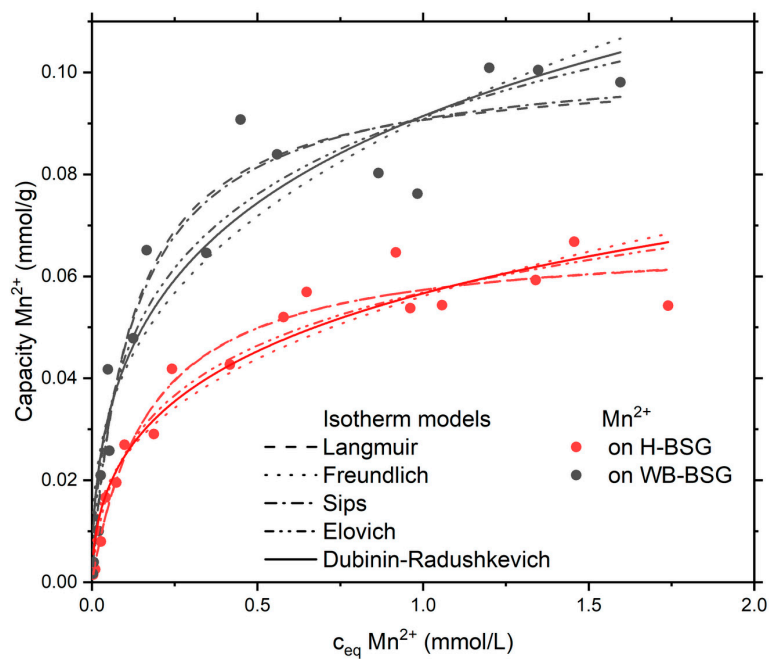

**Figure S10.** Curve fitting of different isotherm models onto  $\text{Mn}^{2+}$  ion adsorption onto H-BSG and WB-BSG in batch experiment with constant dosage of adsorber material (3.33 g/L), varying initial concentrations  $\text{MnSO}_4$ , pH not adjusted 24 h, r.t..

## 1.2.6 Comparison of isotherm model fitting

**Table S7.** Fitting parameters for different adsorption isotherm models. Data from batch experiments; constant dosage of H-BSG or WB-BSG 3.33 g/L, varying initial concentrations FeSO<sub>4</sub> or MnSO<sub>4</sub>, pH not adjusted, 24 h, r.t.,.

| Adsorption parameters                                        | Fe <sup>2+/3+</sup> |                       | Mn <sup>2+</sup>   |                 |
|--------------------------------------------------------------|---------------------|-----------------------|--------------------|-----------------|
|                                                              | H-BSG               | WB-BSG                | H-BSG              | WB-BSG          |
| <b>Langmuir</b>                                              |                     |                       |                    |                 |
| $Q_{m,L}$ (mmol/g)                                           | 0.191 ± 0.01        | 0.226 ± 0.013         | 0.0674 ± 0.003     | 0.101 ± 0.005   |
| $K_L$ (L/mmol)                                               | 9.585 ± 2.625       | 11.443 ± 3.280        | 5.718 ± 0.981      | 8.489 ± 1.731   |
| $R^2$                                                        | 0.884               | 0.869                 | 0.964              | 0.951           |
| $\Delta G^\circ$ (kJ/mol)                                    | -22.72              | -23.15                | -21.44             | -22.41          |
| <b>Freundlich</b>                                            |                     |                       |                    |                 |
| $n$                                                          | 3.494 ± 0.563       | 3.852 ± 0.719         | 2.805 ± 0.350      | 2.937 ± 0.383   |
| $K_F$ (L/mmol) <sup>1/n</sup>                                | 0.153 ± 0.009       | 0.185 ± 0.012         | 0.0561 ± 0.002     | 0.0909 ± 0.004  |
| $R^2$                                                        | 0.791               | 0.729                 | 0.910              | 0.890           |
| <b>Sips</b>                                                  |                     |                       |                    |                 |
| $Q_{m,S}$ (mmol/g)                                           | 0.182 ± 0.011       | 0.209 ± 0.009         | 0.0678 ± 0.006     | 0.104 ± 0.011   |
| $K_S$ (L/mmol) <sup>n</sup>                                  | 22.145 ± 24.266     | 786.822 ±<br>1935,065 | 5.471 ± 3.133      | 6.793 ± 4.889   |
| $n$                                                          | 1.280 ± 0.351       | 2.6196 ± 0.962        | 0.98428 ±<br>0.191 | 0.93208 ± 0.212 |
| $R^2$                                                        | 0.888               | 0.894                 | 0.964              | 0.952           |
| <b>Elovich</b>                                               |                     |                       |                    |                 |
| $Q_{m,E}$ (mmol/g)                                           | 0.0474 ± 0.008      | 0.0514 ± 0.010        | 0.0213 ± 0.003     | 0.0301 ± 0.004  |
| $K_E$                                                        | 103.734 ± 73.78     | 166.266 ± 140,872     | 38.598 ±<br>17.400 | 63.712 ± 31.637 |
| $R^2$                                                        | 0.844               | 0.795                 | 0.945              | 0.942           |
| <b>Dubinin-Radushkevich</b>                                  |                     |                       |                    |                 |
| $Q_{m,DR}$ (mmol/g)                                          | 0.376 ± 0.052       | 0.417 ± 0.063         | 0.163 ± 0.021      | 0.244 ± 0.033   |
| $\beta$ (10 <sup>-9</sup> mol <sup>2</sup> /J <sup>2</sup> ) | 2.931 ± 0.445       | 2.649 ± 0.462         | 3.616 ± 0.394      | 3.342 ± 0.389   |
| $R^2$                                                        | 0.824               | 0.773                 | 0.934              | 0.927           |
| $E_{ads}$ (kJ/mol)                                           | 13.06 ± 0.99        | 13.74 ± 1.20          | 11.76 ± 0.64       | 12.23 ± 0.71    |

### 1.2.7 SEM-EDX Analysis of BSG after adsorption of iron ions

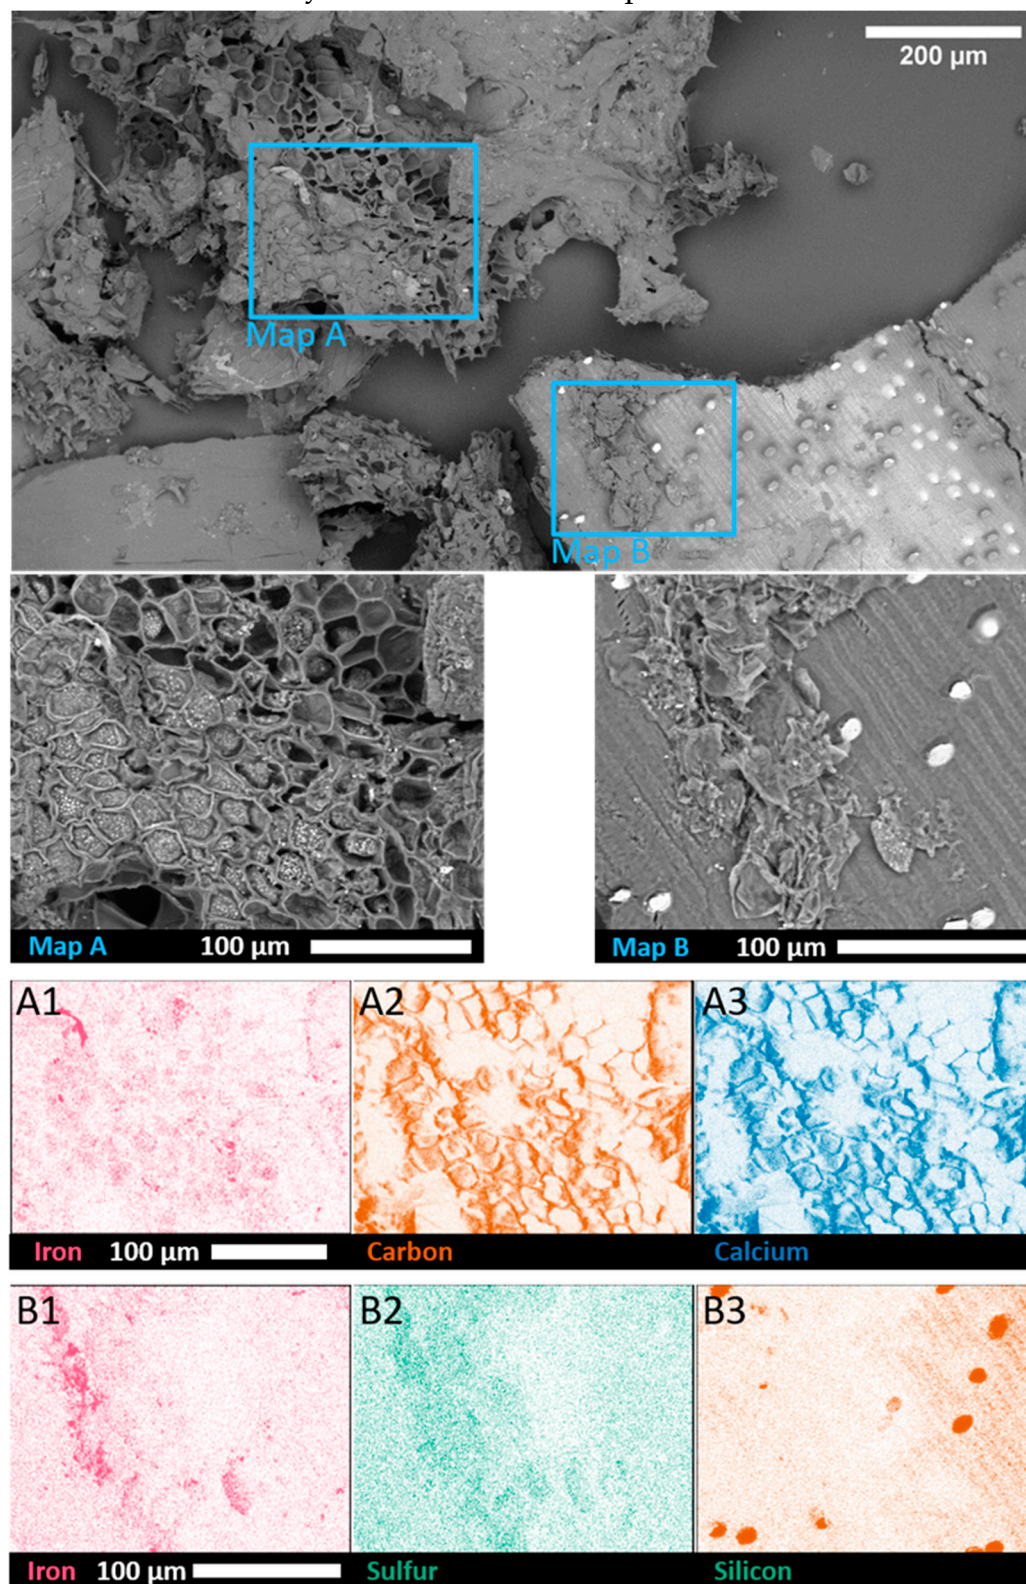

**Figure S11.** SEM-EDX elemental mapping of H-BSG after adsorption in batch experiments with  $\text{FeSO}_4$  (2.68 mmol/L), 24 h at 23 °C. Top: regions selected for mapping highlighted as blue rectangles, map A and map B shown below. All subfigure scale bars represent 100  $\mu\text{m}$ . Subfigure: Selected element mappings A1 and B1 iron; A2 carbon, B2 sulfur; A3 calcium; B3 silico; data summarized in Table S8.

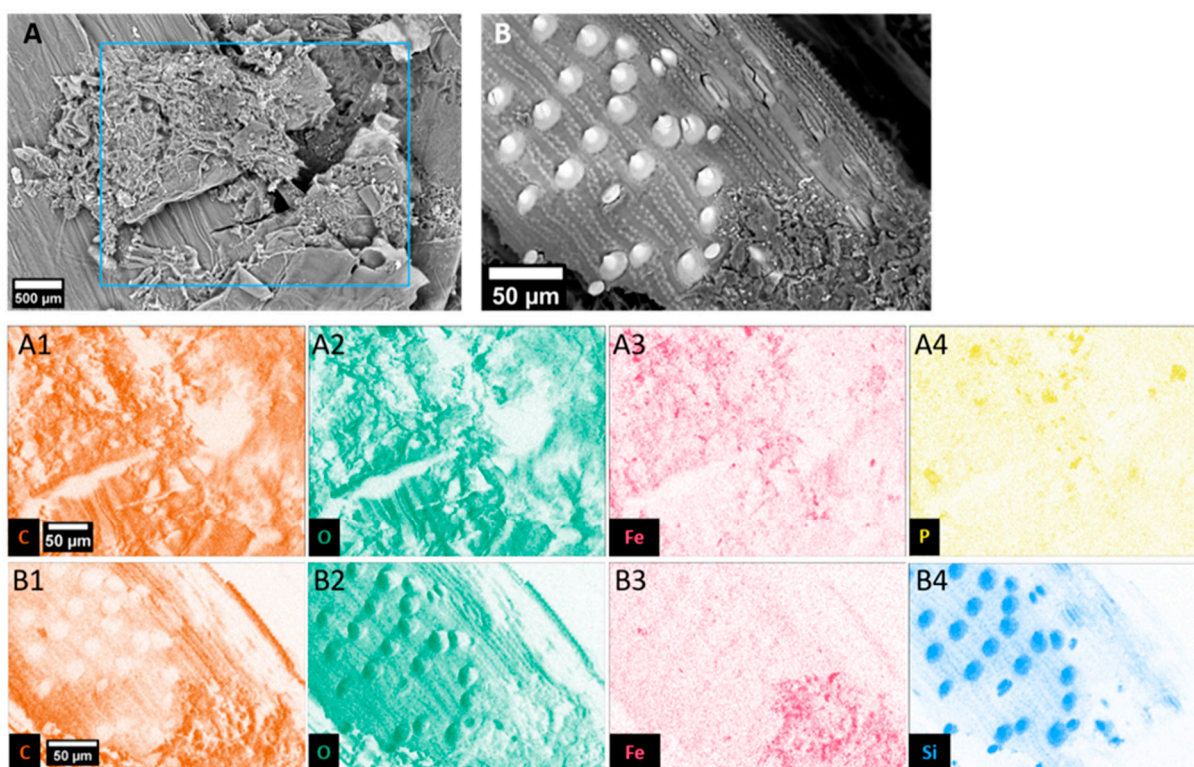

**Figure S12.** SEM-EDX elemental mapping of WB-BSG after adsorption in batch experiments with  $\text{FeSO}_4$  (2.68 mmol/L), 24 h at 23 °C, all EDX scale bars = 50 μm. Subfigures A and B are SEM micrographs, blue rectangles in A highlights mapped area Map A. Subfigures show selected element mappings: A1 and B1 carbon; A2 and B2 oxygen; A3 and B3 iron; A4 phosphorus; B4 silicon; data summarized in Table S8.

**Table S8.** Elemental concentration as percentages detected on BSG surface after adsorption in batch experiments with FeSO<sub>4</sub> (2.68 mmol/L), 24 h at 23 °C. Investigated in two areas (map A and map B) of H-BSG Figure S10 and WB-BSG (Figure S11).

|                               | <b>H-BSG (Figure S10)</b> |              | <b>WB-BSG (Figure S11)</b> |              |
|-------------------------------|---------------------------|--------------|----------------------------|--------------|
| <b>% atomic concentration</b> | <b>Map A</b>              | <b>Map B</b> | <b>Map A</b>               | <b>Map B</b> |
| Carbon                        | 66.896                    | 61.556       | 61.601                     | 54.700       |
| Oxygen                        | 30.968                    | 37.171       | 37.754                     | 41.418       |
| Phosphorus                    | 0.858                     | 0.089        | 0.224                      | -            |
| Calcium                       | 0.175                     | -            | -                          | -            |
| Iron                          | 1.103                     | 0.271        | 0.422                      | 0.154        |
| Sulphur                       | -                         | 0.129        | -                          | -            |
| Silicon                       | -                         | 0.784        | -                          | 3.728        |
| <b>% weight concentration</b> | <b>Map A</b>              | <b>Map B</b> | <b>Map A</b>               | <b>Map B</b> |
| Carbon                        | 57.631                    | 53.646       | 53.831                     | 45.846       |
| Oxygen                        | 35.542                    | 43.157       | 43.952                     | 46.246       |
| Phosphorus                    | 1.908                     | 0.200        | 0.504                      | -            |
| Calcium                       | 0.502                     | -            | -                          | -            |
| Iron                          | 4.418                     | 1.099        | 1.714                      | 0.601        |
| Sulphur                       | -                         | 0.300        | -                          | -            |
| Silicon                       | -                         | 1.598        | -                          | 7.307        |

### 1.2.8 SEM-EDX Analysis of BSG after adsorption of manganese ions

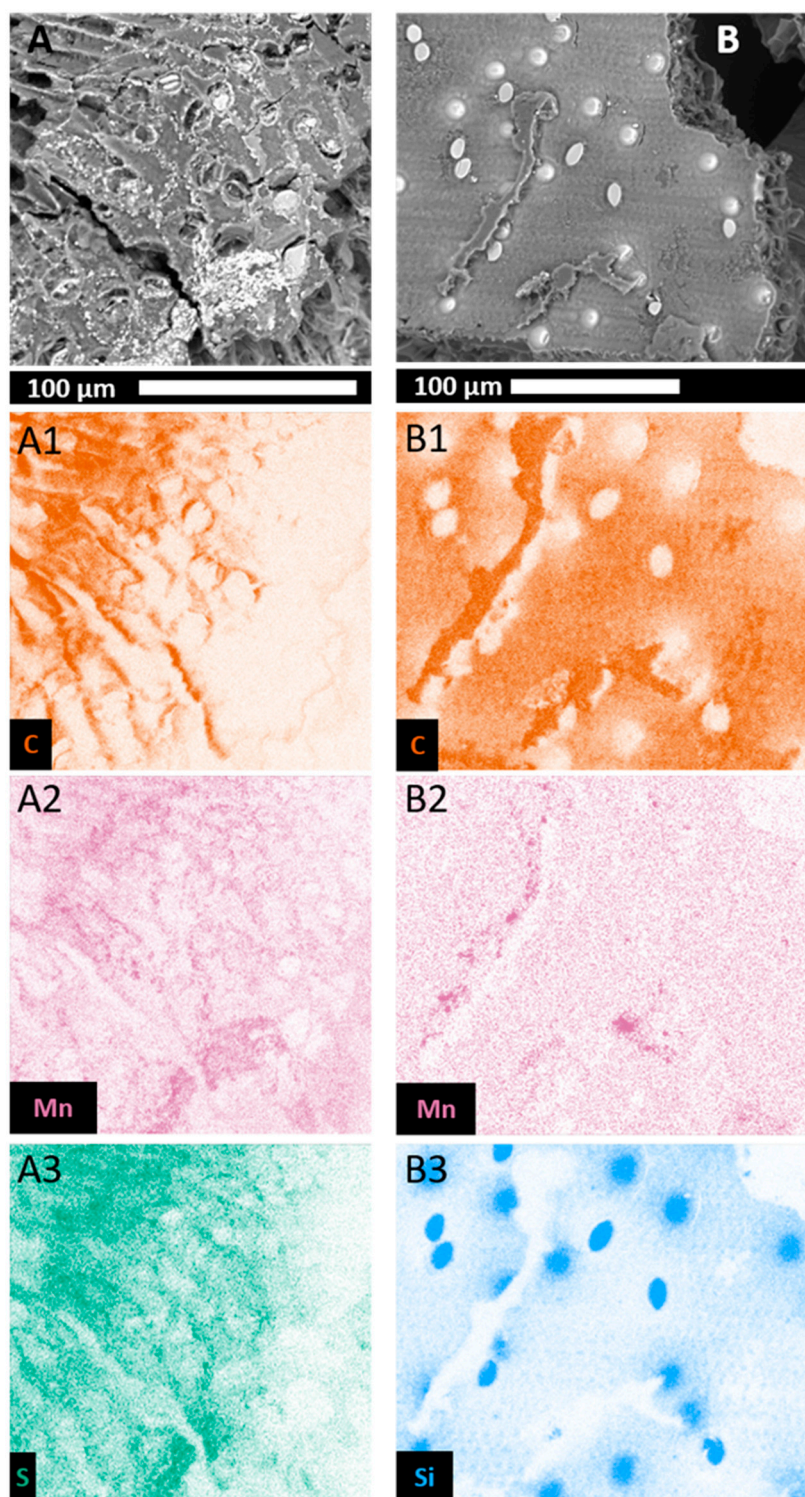

**Figure S13.** SEM-EDX elemental mapping of H-BSG after adsorption in batch experiments with  $\text{MnSO}_4$  (2.91 mmol/L), 24 h at 23 °C, universal scale bars = 100  $\mu\text{m}$ . Subfigures A and B are SEM micrographs of mapped areas. Subfigures show selected element mappings: A1 und B1 carbon; A2 und B2 manganese ; A3 sulphur; B3 silicon; data summarized in Table S9.

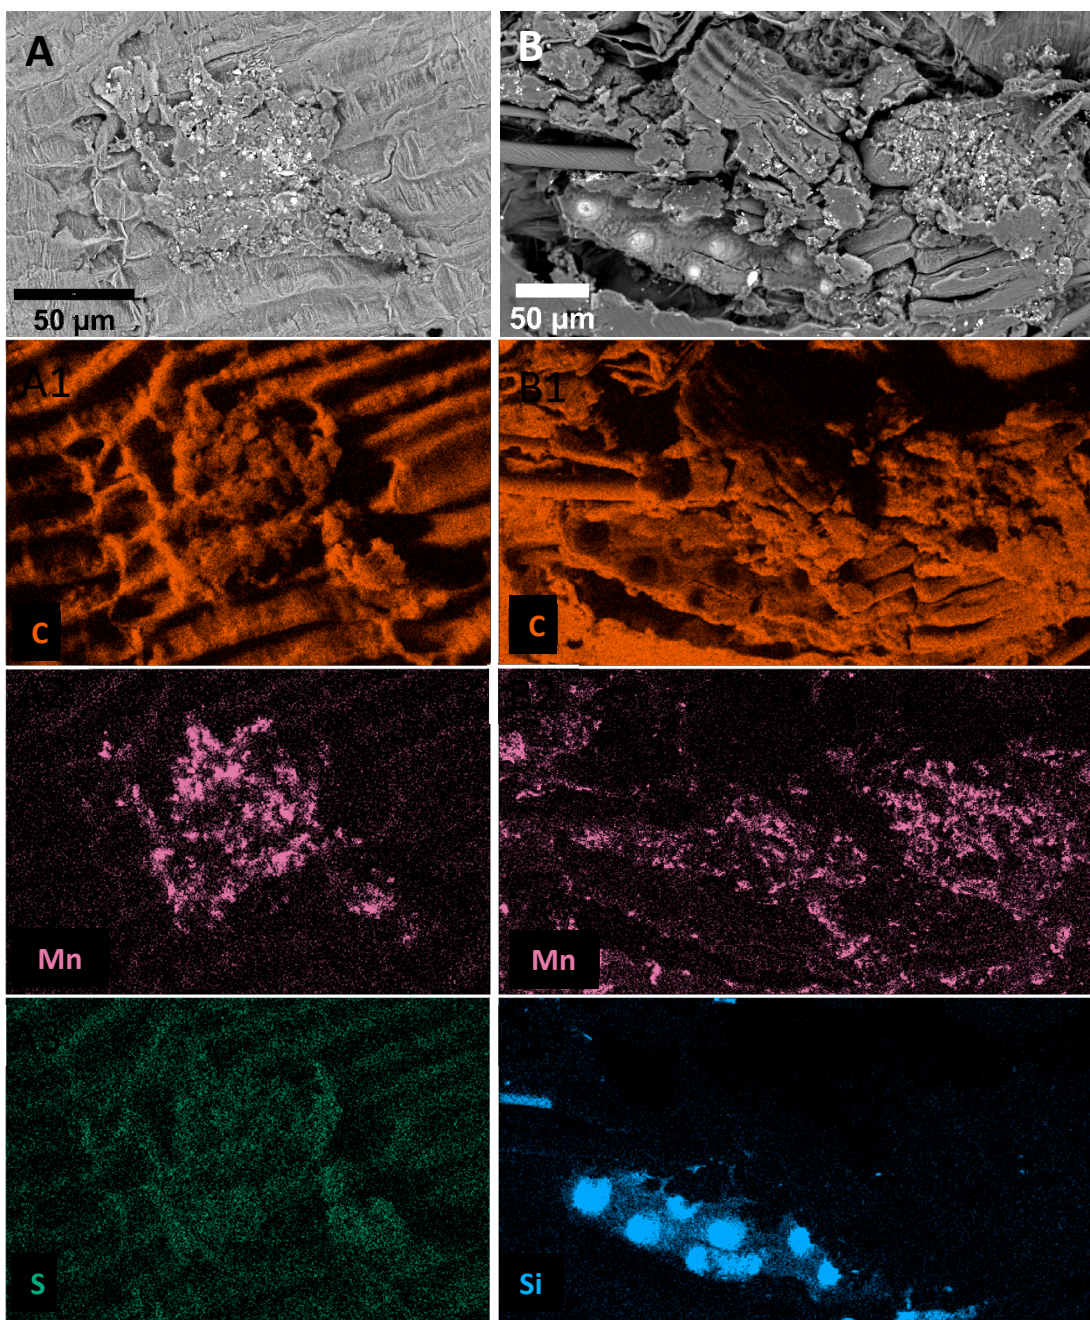

**Figure S14.** SEM-EDX elemental mapping of WB-BSG after adsorption in batch experiments with  $\text{MnSO}_4$  (2.73 mmol/L), 24 h at 23 °C, universal scale bars = 50 µm. Subfigures A and B are SEM micrographs of mapped areas. Subfigures show selected element mappings: A1 und B1 carbon; A2 und B2 manganese; A3 sulphur; B3 silicon; data summarized in Table S9.

**Table S9.** Elemental concentration as percentages detected on BSG surface after adsorption in batch experiments with  $\text{MnSO}_4$  (H-BSG: 2.91 mmol/L; WB-BSG 2.73 mmol/L), 24 h at 23 °C. Investigated in two areas (map A and map B) of H-BSG (Figure S12) and WB-BSG (Figure S13).

|                               | <b>H-BSG (Figure S12)</b> |              | <b>WB-BSG (Figure S13)</b> |              |
|-------------------------------|---------------------------|--------------|----------------------------|--------------|
| <b>% atomic concentration</b> | <b>Map A</b>              | <b>Map B</b> | <b>Map A</b>               | <b>Map B</b> |
| Carbon                        | 64.811                    | 56.385       | 68.222                     | 63.945       |
| Oxygen                        | 30.009                    | 41.002       | 31.397                     | 35.444       |
| Silicon                       | 0.584                     | 2.561        | -                          | 0.486        |
| Manganese                     | 2.633                     | 0.051        | 0.209                      | 0.124        |
| Sulphur                       | 1.488                     | -            | 0.171                      | -            |
| Phosphorus                    | 0.289                     | -            | -                          | -            |
| Calcium                       | 0.186                     | -            | -                          | -            |
| <b>% weight concentration</b> | <b>Map A</b>              | <b>Map B</b> | <b>Map A</b>               | <b>Map B</b> |
| Carbon                        | 52.462                    | 48.096       | 61.245                     | 56.653       |
| Oxygen                        | 32.362                    | 46.593       | 37.550                     | 41.835       |
| Silicon                       | 1.106                     | 5.110        | -                          | 1.008        |
| Manganese                     | 9.749                     | 0.200        | 0.502                      | 0.504        |
| Sulphur                       | 3.216                     | -            | 0.703                      | -            |
| Phosphorus                    | 0.603                     | -            | -                          | -            |
| Calcium                       | 0.503                     | -            | -                          | -            |

## 1.2.9 Adsorption with real water samples

**Table S10.** Initial concentrations  $c_0$  of selected pollutants in 2 water samples from German surface waters and sorption efficiency by H-BSG and WB-BSG given as averages of six batches with standard deviation. Batch experiments performed with real water, 3.33 g/L dosage of H-BSG or WB-BSG for 24 h at r. t.

| Parameter                                   | Sample 1          |                    |                  | Sample 2         |                    |                   |
|---------------------------------------------|-------------------|--------------------|------------------|------------------|--------------------|-------------------|
|                                             | $c_0$ mmol/L      | Average sorption % |                  | $c_0$ mmol/L     | Average sorption % |                   |
|                                             |                   | H-BSG              | WB-BSG           |                  | H-BSG              | WB-BSG            |
| Sulfate                                     | 18.850            | $1.6 \pm 0.9$      | $1.8 \pm 1.1$    | 3.958            | $3.9 \pm 1.8$      | $1.8 \pm 4.5$     |
| $\text{Fe}^{2+/3+}$                         | 0.005             | $98.9 \pm 0.7$     | $99.3 \pm 1.1$   | 1.612            | $97.5 \pm 0.6$     | $95.8 \pm 0.9$    |
| $\text{Mn}^{2+}$                            | 0.002             | 0                  | 0                | 0.048            | $0.2 \pm 0.4$      | $0.7 \pm 0.7$     |
| Si                                          | 0.176             | 0                  | 0                | 2.182            | $0.8 \pm 0.9$      | $1.3 \pm 3.1$     |
| $\text{pH}_0$ ; av. $\text{pH}_{\text{eq}}$ | 6.98 <sup>1</sup> | 6.27 <sup>2</sup>  | 6.3 <sup>2</sup> | 3.1 <sup>1</sup> | 3.18 <sup>2</sup>  | 3.25 <sup>2</sup> |

<sup>1</sup>  $\text{pH}_0$  in the respective surface water samples

<sup>2</sup> average (av.)  $\text{pH}_{\text{eq}}$  after sorption experiments

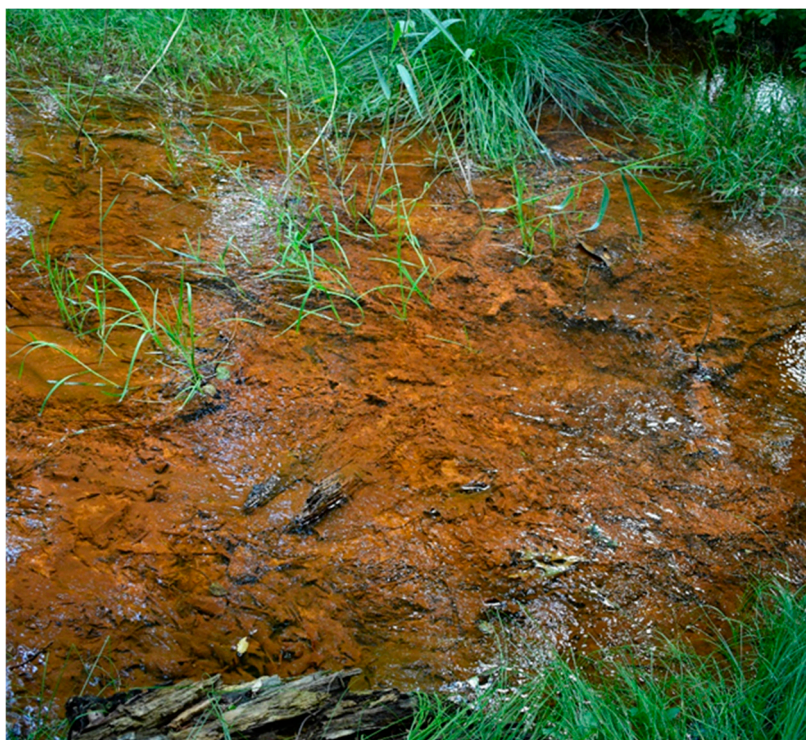

**Figure S15.** Exemplary photograph of the state of German surface waters in mine drainage regions (real water sample 2).

### 1.2.10 Adsorption with NiSO<sub>4</sub>

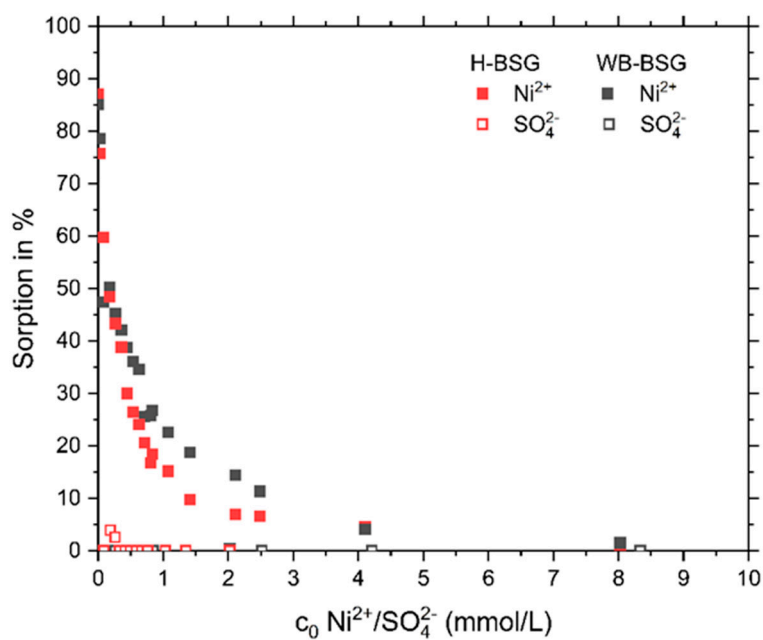

**Figure S16.** Adsorption in % for Ni<sup>2+</sup> and SO<sub>4</sub><sup>2-</sup> ions with H-BSG and WB-BSG, obtained from batch experiments and stirred for 24 h.

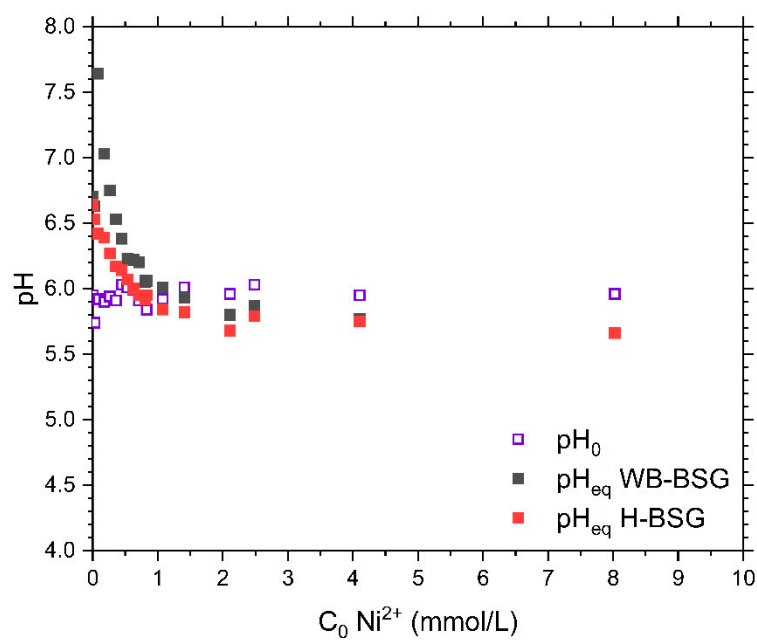

**Figure S17.** pH values before (pH<sub>0</sub>) and after (pH<sub>eq</sub>) for the adsorption of Ni<sup>2+</sup> and SO<sub>4</sub><sup>2-</sup> ions onto H-BSG and WB-BSG, obtained from batch experiments, stirred 24 h and pH not adjusted.

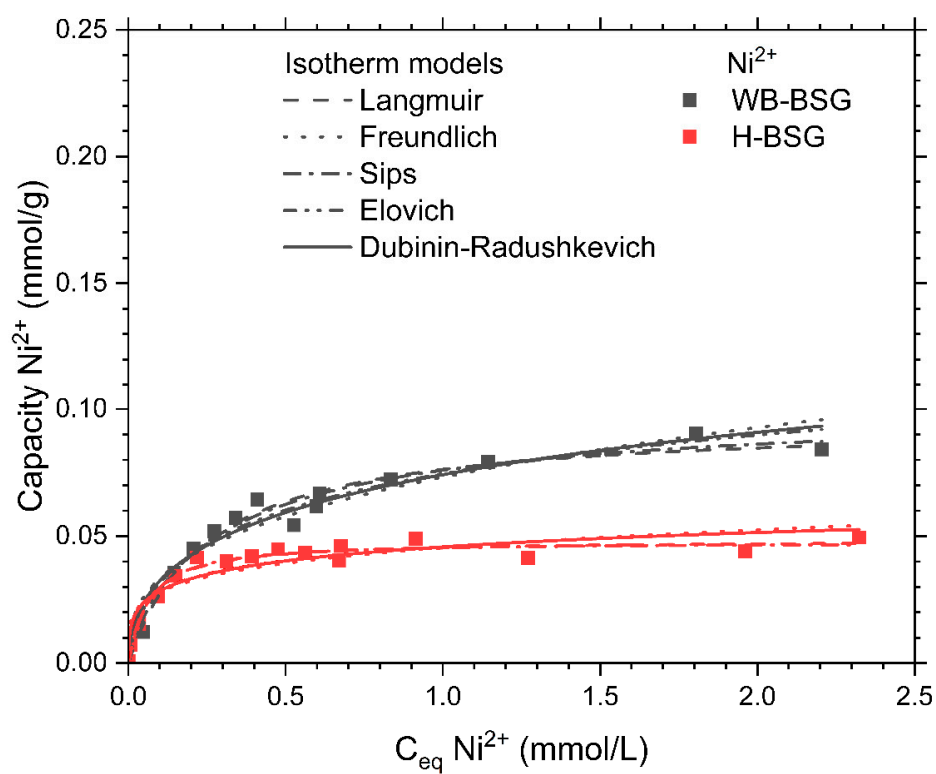

**Figure S18.** Curve fitting of different isotherm models onto  $\text{Ni}^{2+}$  adsorption onto H-BSG (red) and WB-BSG (grey) in batch experiment.

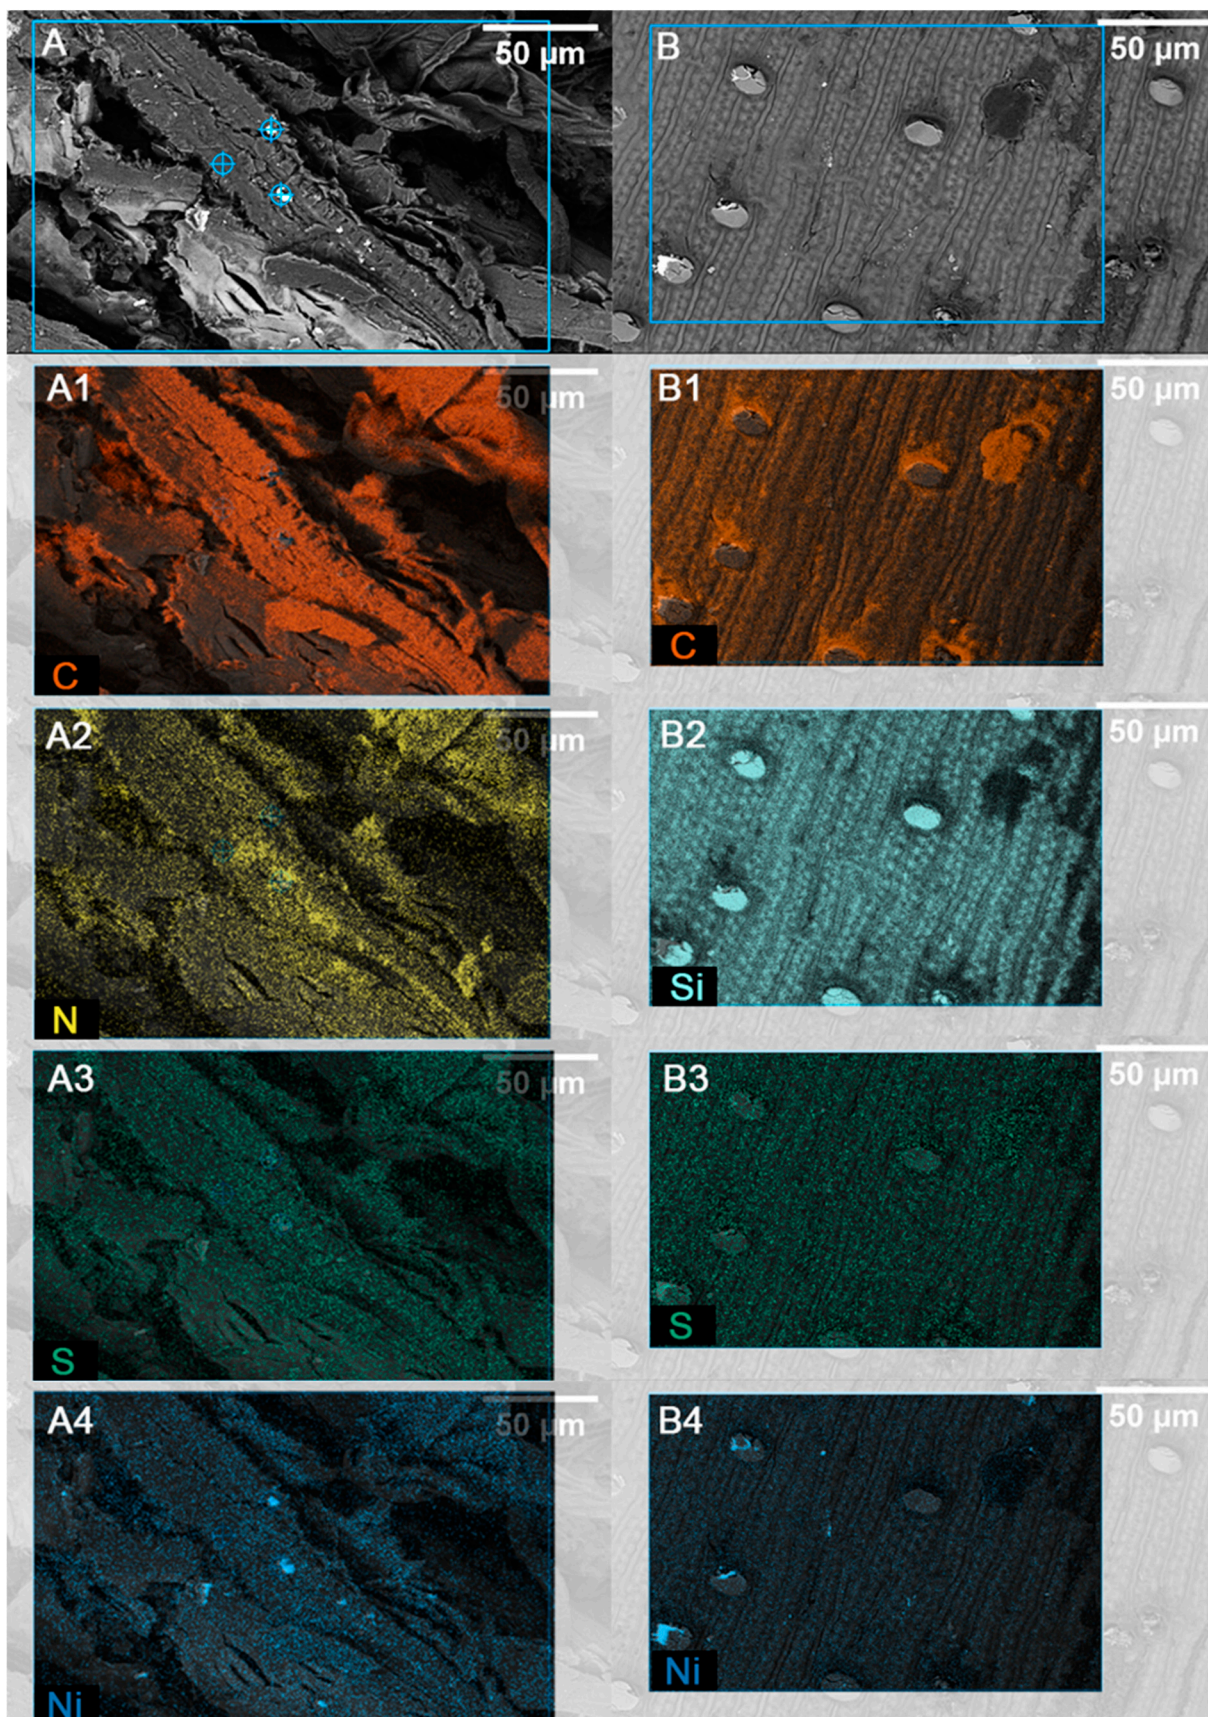

**Figure S19.** SEM-EDX elemental mapping of H-BSG after adsorption in batch experiments with  $\text{NiSO}_4$  (2.5 mmol/L), 24 h at 23 °C, universal scale bars = 50 µm. Subfigures A and B are SEM micrographs of mapped areas. Subfigures show selected element mappings: A1 and B1 carbon; A2 nitrogen and B2 silicon; A3 and B3 sulphur and A4 and B4 nickel.

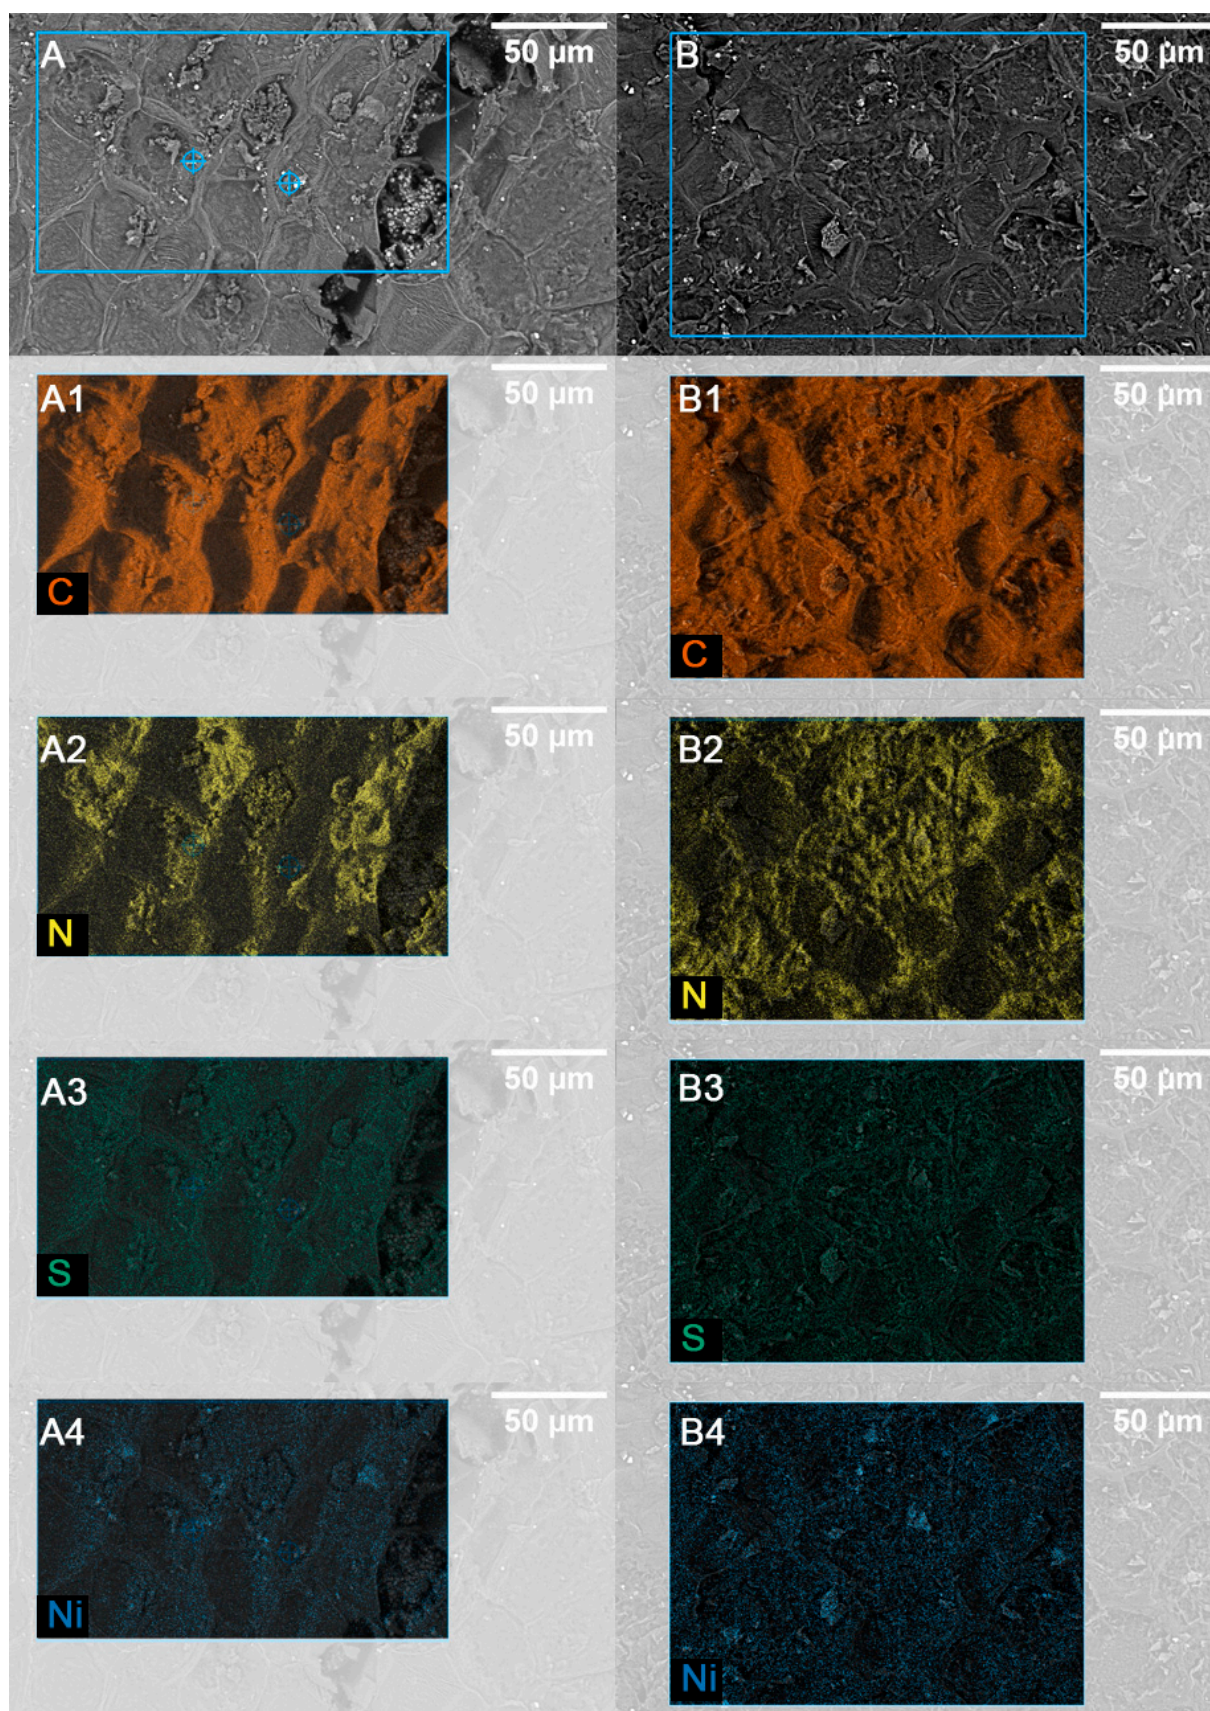

**Figure S20.** SEM-EDX elemental mapping of WB-BSG after adsorption in batch experiments with  $\text{NiSO}_4$  (2.5 mmol/L), 24 h at 23 °C, universal scale bars = 50  $\mu\text{m}$ . Subfigures A and B are SEM micrographs of mapped areas. Subfigures show selected element mappings: A1 and B1 carbon; A2 and B2 nitrogen, A3 and B3 sulphur and A4 and B4 nickel.

**Table S11.** Elemental concentration as percentages detected on BSG surface after adsorption in batch experiments with NiSO<sub>4</sub> (H-BSG: 2.5 mmol/L; WB-BSG 2.5 mmol/L), 24 h at 23 °C. Investigated in two areas (map A and map B) of H-BSG (**Figure S**) and WB-BSG (**Figure S18**).

|                               | <b>H-BSG (Figure S)</b> |              | <b>WB-BSG (Figure S18)</b> |              |
|-------------------------------|-------------------------|--------------|----------------------------|--------------|
| <b>% atomic concentration</b> | <b>Map A</b>            | <b>Map B</b> | <b>Map A</b>               | <b>Map B</b> |
| Carbon                        | 52.145                  | 39.897       | 52.736                     | 52.671       |
| Oxygen                        | 7.765                   | 6.321        | 19.111                     | 22.625       |
| Nitrogen                      | 39.054                  | 42.204       | 27.777                     | 24.422       |
| Silicon                       | 0.695                   | 11.260       | 0.048                      | -            |
| Nickel                        | 0.166                   | 0.269        | 0.116                      | 0.070        |
| Sulphur                       | 0.174                   | 0.049        | 0.212                      | 0.213        |

### 1.2.11 Adsorption with CdSO<sub>4</sub>

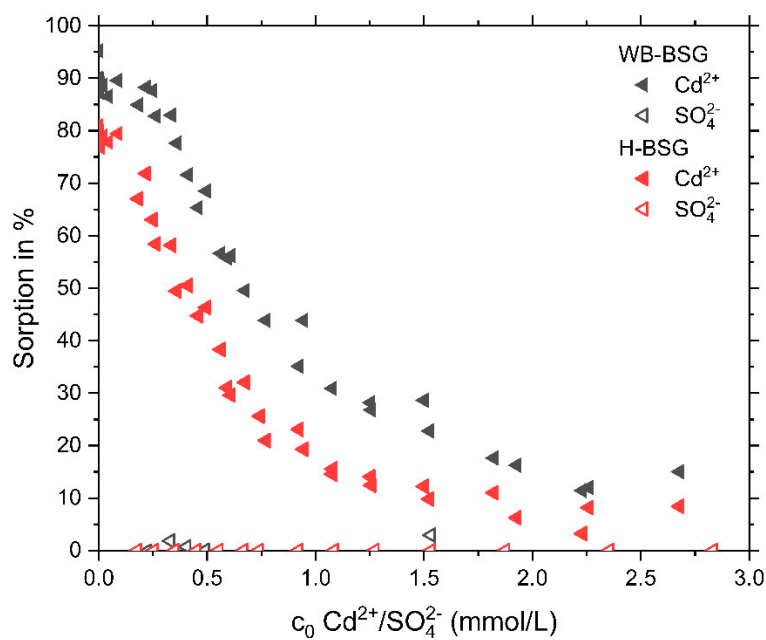

**Figure S21.** Adsorption in % for Cd<sup>2+</sup> and SO<sub>4</sub><sup>2-</sup> ions with H-BSG and WB-BSG, obtained from batch experiments and stirred for 24 h.

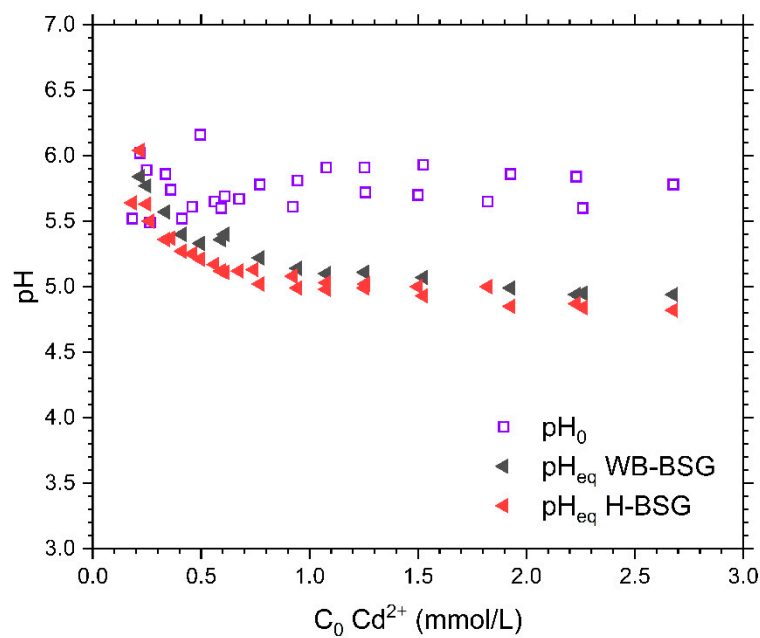

**Figure S22.** pH values before (pH<sub>0</sub>) and after (pH<sub>eq</sub>) for the adsorption of Cd<sup>2+</sup> and SO<sub>4</sub><sup>2-</sup> ions onto H-BSG and WB-BSG, obtained from batch experiments, stirred 24 h and pH not adjusted.

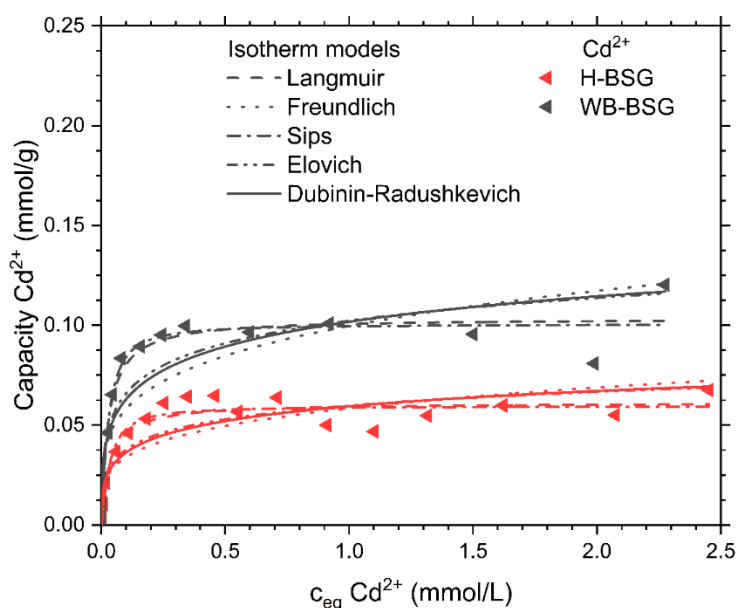

**Figure S23.** Curve fitting of different isotherm models onto  $\text{Cd}^{2+}$  ion adsorption onto H-BSG (red) and WB-BSG (grey) in batch experiment. Isotherm model fitting for  $\text{CdSO}_4$  and  $\text{NiSO}_4$

**Table S12.** Comparison fitting parameters for different adsorption isotherm models, values for Figure S18 and Figure S23.

| Adsorption parameters                  | $\text{Ni}^{2+}$      |                    | $\text{Cd}^{2+}$      |                       |
|----------------------------------------|-----------------------|--------------------|-----------------------|-----------------------|
|                                        | H-BSG                 | WB-BSG             | H-BSG                 | WB-BSG                |
| <b>Langmuir</b>                        |                       |                    |                       |                       |
| $Q_{m,L}$ (mmol/g)                     | $0.048 \pm 0.001$     | $0.095 \pm 0.004$  | $0.061 \pm 0.002$     | $0.104 \pm 0.003$     |
| $K_L$ (L/mmol)                         | $15.889 \pm 2.587$    | $4.017 \pm 0.508$  | $29.228 \pm 6.406$    | $34.638 \pm 5.947$    |
| $R^2$                                  | 0.969                 | 0.977              | 0.966                 | 0.976                 |
| $\Delta G^\circ$ (kJ/mol)              | -8.306                | -8.724             | -6.806                | -3.422                |
| <b>Freundlich</b>                      |                       |                    |                       |                       |
| $n$                                    | $4.777 \pm 0.849$     | $2.930 \pm 2.929$  | $4.238 \pm 0.696$     | $4.263 \pm 0.681$     |
| $K_F$ (L/mmol) $^{1/n}$                | $0.045 \pm 0.002$     | $0.073 \pm 0.002$  | $0.058 \pm 0.003$     | $0.100 \pm 0.007$     |
| $R^2$                                  | 0.837                 | 0.943              | 0.833                 | 0.843                 |
| <b>Sips</b>                            |                       |                    |                       |                       |
| $Q_{m,S}$ (mmol/g)                     | $0.0476 \pm 0.002$    | $0.104 \pm 0.011$  | $0.0595 \pm 0.002$    | $0.101 \pm 0.003$     |
| $K_S$ (L/mmol) $^n$                    | $20.984 \pm 11.856$   | $2.730 \pm 1.038$  | $78.559 \pm 72.000$   | $92.796 \pm 73.421$   |
| $n$                                    | $1.098 \pm 0.185$     | $0.849 \pm 0.132$  | $1.280 \pm 0.246$     | $1.262 \pm 0.206$     |
| $R^2$                                  | 0.9670                | 0.979              | 0.969                 | 0.979                 |
| <b>Elovich</b>                         |                       |                    |                       |                       |
| $Q_{m,E}$ (mmol/g)                     | $0.009 \pm 0.001$     | $0.030 \pm 0.003$  | $0.012 \pm 0.002$     | $0.020 \pm 0.003$     |
| $K_E$                                  | $644.423 \pm 543.065$ | $30.079 \pm 9.951$ | $751.719 \pm 600.500$ | $963.399 \pm 722.492$ |
| $R^2$                                  | 0.908                 | 0.972              | 0.908                 | 0.922                 |
| <b>Dubinin-Radushkevich</b>            |                       |                    |                       |                       |
| $Q_{m,DR}$ (mmol/g)                    | $0.084 \pm 0.010$     | $0.215 \pm 0.021$  | $0.112 \pm 0.013$     | $0.189 \pm 0.022$     |
| $\beta$ ( $10^{-9}$ mol $^2$ /J $^2$ ) | $2.087 \pm 0.319$     | $3.632 \pm 0.291$  | $2.165 \pm 0.326$     | $2.110 \pm 0.300$     |
| $R^2$                                  | 0.889                 | 0.963              | 0.882                 | 0.894                 |
| $E_{Ads,DR}$                           | $15.48 \pm 1.18$      | $11.73 \pm 0.47$   | $15.20 \pm 1.14$      | $15.39 \pm 1.10$      |

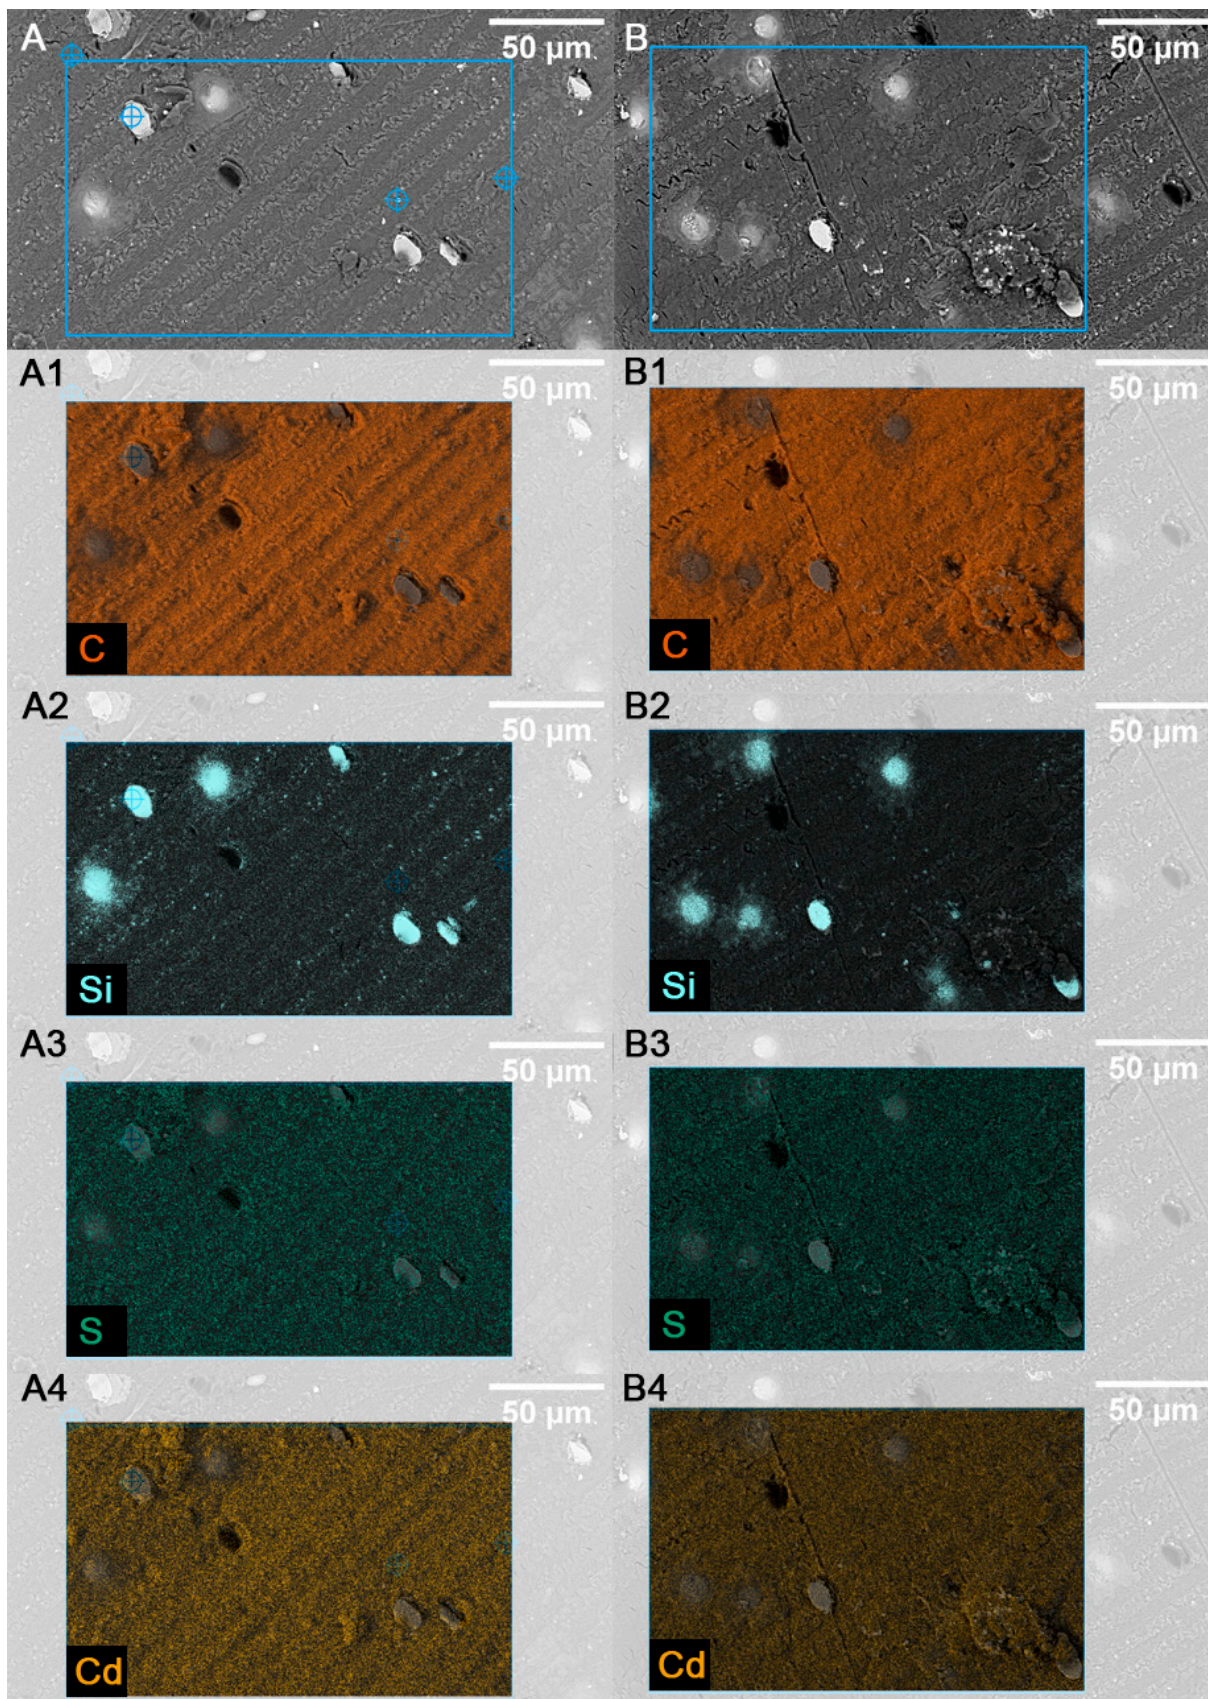

**Figure S24.** SEM-EDX elemental mapping of H-BSG after adsorption in batch experiments with  $\text{CdSO}_4$  (2.7 mmol/L), 24 h at 23 °C, universal scale bars = 50  $\mu\text{m}$ . Subfigures A and B are SEM micrographs of mapped areas. Subfigures show selected element mappings: A1 and B1 carbon; A2 and B2 silicon; A3 and B3 sulphur and A4 and B4 cadmium.

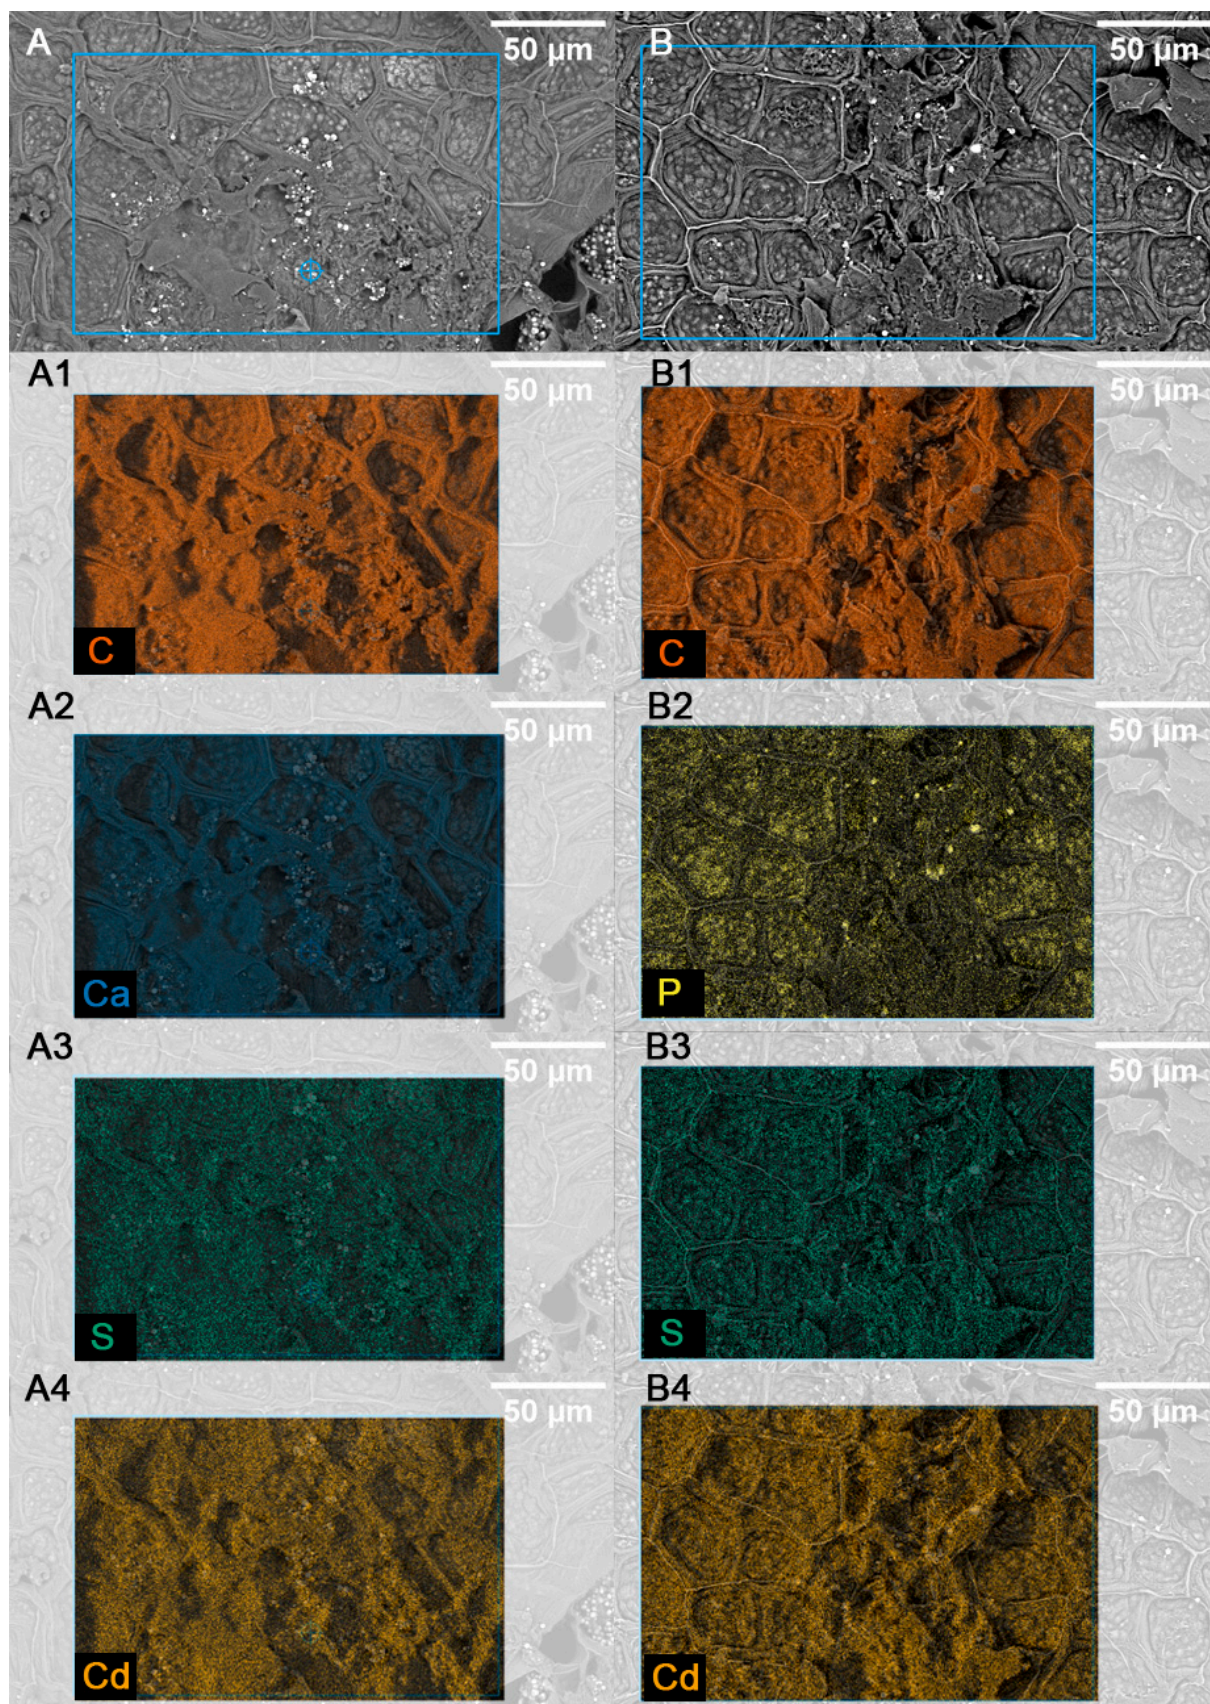

**Figure S25.** SEM-EDX elemental mapping of WB-BSG after adsorption in batch experiments with CdSO<sub>4</sub> (2.7 mmol/L), 24 h at 23 °C, universal scale bars = 50 µm. Subfigures A and B are SEM micrographs of mapped areas. Subfigures show selected element mappings: A1 and B1 carbon; A2 calcium and B2 phosphorus; A3 and B3 sulphur and A4 and B4 cadmium.

**Table S13.** Elemental concentration as percentages detected on BSG surface after adsorption in batch experiments with CdSO<sub>4</sub> (H-BSG: 2.7 mmol/L; WB-BSG 2.7 mmol/L), 24 h at 23 °C. Investigated in two areas (map A and map B) of H-BSG (*Figure S20*) and WB-BSG (*Figure S21*).

| % atomic<br>concentration | H-BSG (Figure S20) |        | WB-BSG (Figure S21) |        |
|---------------------------|--------------------|--------|---------------------|--------|
|                           | Map A              | Map B  | Map A               | Map B  |
| Carbon                    | 58.188             | 61.624 | 54.644              | 59.305 |
| Oxygen                    | 8.981              | 4.713  | 15.448              | 10.030 |
| Nitrogen                  | 31.711             | 32.414 | 28.799              | 29.878 |
| Phosphorus                | -                  | -      | 0.496               | 0.400  |
| Calcium                   | -                  | -      | 0.139               | -      |
| Silicon                   | 0.974              | 1.028  | -                   | -      |
| Cadmium                   | 0.061              | 0.135  | 0.286               | 0.257  |
| Sulphur                   | 0.085              | 0.086  | 0.131               | 0.129  |

## 2 Literature comparison of adsorption capacities

### 2.1 Literature comparison of adsorption capacities for iron ions

**Table S144.** Sorption capacities for  $\text{Fe}^{2+/3+}$  removal from aqueous solutions with different biosorbents and adsorbent doses (a.d.). The obtained sorption capacities from this work were achieved in the batch adsorption experiments.

| Material                                   | Sorption capacity q (mg/g) | Salt            | Experimental conditions |            |                | Ref.      |
|--------------------------------------------|----------------------------|-----------------|-------------------------|------------|----------------|-----------|
|                                            |                            |                 | pH <sub>0</sub>         | a.d. (g/L) | t, T           |           |
| <b>Helles brewer's spent grain</b>         | 10.2                       | $\text{FeSO}_4$ | 5.5                     | 3.33       | 24 h, 23 °C    | This work |
| <b>Wheat beer brewer's spent grain</b>     | 11.7                       | $\text{FeSO}_4$ | 5.5                     | 3.33       | 24 h, 23 °C    | This work |
| <b>brewer's spent grain</b>                | $4 \pm 1$                  | $\text{FeSO}_4$ | 5.9                     | 2          | 24 h, 21 °C    | [4]       |
| <b>brewer's spent grain</b>                | 8.33                       | $\text{FeCl}_3$ | 8                       | 20         | 2 h,           | [2]       |
| <b>brewer's spent grain (Sorghum)</b>      | 1.77                       | $\text{FeSO}_4$ | 5                       | 5          | 10 h, 30 °C    | [5]       |
| <b>Chitosan</b>                            | 128.8                      | $\text{FeSO}_4$ | -                       | 3.33       | 24 h, RT       | [7]       |
| <b>C. vulgaris (alga)</b>                  | 74.54                      | $\text{FeSO}_4$ | 6                       | 0.4        | 5 h, 25 °C     | [8]       |
| <b>activated carbon from coconut shell</b> | 58.76                      | $\text{FeSO}_4$ | 5.8                     | 0.2        | 2 h, 25 °C     | [9]       |
| <b>cow bone charcoal</b>                   | 31.43                      | $\text{FeSO}_4$ | 5.1                     | 0.2        | 110 min, 25 °C | [10]      |

## 2.2 Literature comparison of adsorption capacities for manganese ions

**Table S1515.** Sorption capacities for  $\text{Mn}^{1+/2+}$  removal from aqueous solutions with different biosorbents and adsorbent doses (a.d.). The obtained sorption capacities from this work were achieved in the batch adsorption experiments.

| Material                                                      | Sorption capacity q (mg/g) | Salt                              | Experimental conditions |            |                | Ref.      |
|---------------------------------------------------------------|----------------------------|-----------------------------------|-------------------------|------------|----------------|-----------|
|                                                               |                            |                                   | pH <sub>0</sub>         | a.d. (g/L) | t, T           |           |
| <i>Helles brewer's spent grain</i>                            | 3.72                       | MnSO <sub>4</sub>                 | 6                       | 3.33       | 24 h, 22 °C    | This work |
| <b>Wheat beer brewer's spent grain</b>                        | 5.71                       | MnSO <sub>4</sub>                 | 6                       | 3.33       | 24 h, 22 °C    | This work |
| <b>brewer's spent grain</b>                                   | 0.96 ± 0.02                | MnSO <sub>4</sub>                 | -                       | 2.0        | 24 h, 21 °C    | [4]       |
| <b>brewer's spent grain</b>                                   | 1.1                        | Mn (II)                           | 4.4-4.5                 | 2.5        | 1 h,-          | [11]      |
| <b>Sugarcane bagasse</b>                                      | 0.676                      | MnSO <sub>4</sub>                 | 4.5                     | 15         | 1 h, 23 ± 2 °C | [12]      |
| <b>Chitosan</b>                                               | 27.5                       | MnSO <sub>4</sub>                 | -                       | 3.33       | 24 h, RT       | [7]       |
| <b>Pecan nutshell</b>                                         | 98.0                       | MnSO <sub>4</sub>                 | -                       | 5.5        | 5 h, 25 °C     | [13]      |
| <i>Arthrobacter cells</i>                                     | 406                        | Mn (II)                           | 5-5.5                   | 0.26       | 30 °C          | [14]      |
| <b>C. vulgaris (alga)</b>                                     | 69.29                      | MnCl <sub>2</sub>                 | 6                       | 0.4        | 5 h, 25 °C     | [8]       |
| <b>hydrolyzed olive cake</b>                                  | 3.57                       | MnNO <sub>3</sub>                 | 6                       | 5          | 2 h, 25 °C     | [15]      |
| <b>volcanic ash geopolymer</b>                                | 192                        | MnSO <sub>4</sub>                 | 6.3                     | 5          | 30 min, RT     | [16]      |
| <b>metakaolin based geopolymer</b>                            | 72.34                      | MnSO <sub>4</sub>                 | 6                       | 3.2        | 25 min, 30 °C  | [17]      |
| <b>activated carbon from coconut shell</b>                    | 51.23                      | Mn(NO <sub>3</sub> ) <sub>2</sub> | 5.8                     | 0.2        | 2 h, 25 °C     | [9]       |
| <b>cow bone charcoal</b>                                      | 29.59                      | Mn(NO <sub>3</sub> ) <sub>2</sub> | 5.1                     | 0.2        | 110 min, 25 °C | [10]      |
| <b>sodium alginate/graphene oxide double network hydrogel</b> | 56.49                      | MnCl <sub>2</sub>                 | 6                       | 3          | 9 h, 25 °C     | [18]      |

## 2.3 Literatur comparison of adsorption capacities for nickel ions

**Table S16.** Sorption capacities for Ni<sup>2+</sup> removal from aqueous solutions with different biosorbents and adsorbent doses (a.d.). The obtained sorption capacities from this work were achieved in the batch adsorption experiments.

| Material                                                | Sorption capacity q (mg/g) | Salt                              | Experimental conditions |            |                | Ref.      |
|---------------------------------------------------------|----------------------------|-----------------------------------|-------------------------|------------|----------------|-----------|
|                                                         |                            |                                   | pH <sub>0</sub>         | a.d. (g/L) | t, T           |           |
| <b>Helles brewer's spent grain</b>                      | 2.79                       | NiSO <sub>4</sub>                 | 6                       | 3.33       | 24 h, 23 °C    | This work |
| <b>Wheat beer brewer's spent grain</b>                  | 6.10                       | NiSO <sub>4</sub>                 | 6                       | 3.33       | 24 h, 23 °C    | This work |
| <b>peat</b>                                             | 0.23                       | Ni(NO <sub>3</sub> ) <sub>3</sub> | -                       | 0.8        | 24 h, RT       | [6]       |
| <b>chitosan</b>                                         | 105.6                      | NiSO <sub>4</sub>                 | 5.4                     | 2          | 24 h, RT       | [7]       |
| <b>poly(vinylpyrrolidone) hydrogel</b>                  | 13.43                      | NiCl <sub>2</sub>                 | 8                       | 1          | 6 h, 25 °C     | [19]      |
| <b>poly(vinylpyrrolidone-comethylacrylate) hydrogel</b> | 71.52                      | NiCl <sub>2</sub>                 | 8                       | 1          | 6 h, 25 °C     | [19]      |
| <b>activated carbon from coconut shell</b>              | 67.56                      | Ni(NO <sub>3</sub> ) <sub>2</sub> | 5.8                     | 0.2        | 2 h, 25 °C     | [9]       |
| <b>Cow bone charcoal</b>                                | 32.54                      | Ni(NO <sub>3</sub> ) <sub>2</sub> | 5.1                     | 0.2        | 110 min, 25 °C | [10]      |
| <b>chitosan</b>                                         | 66.3                       | Ni(NO <sub>3</sub> ) <sub>2</sub> | -                       | 1          | 5 d, 30 °C     | [20]      |
| <b>chitosan</b>                                         | 49.89                      | NiSO <sub>4</sub>                 | -                       | 1          | 5 d, 30 °C     | [20]      |

## 2.4 Literatur comparison of adsorption capacities for cadmium ions

**Table S17.** Sorption capacities for  $\text{Cd}^{2+}$  removal from aqueous solutions with different biosorbents and adsorbent doses (a.d.). The obtained sorption capacities from this work were achieved in the batch adsorption experiments.

| Material                                                  | Sorption capacity q (mg/g) | Salt                                      | Experimental conditions |            |               | Ref.      |
|-----------------------------------------------------------|----------------------------|-------------------------------------------|-------------------------|------------|---------------|-----------|
|                                                           |                            |                                           | pH <sub>0</sub>         | a.d. (g/L) | t, T          |           |
| Helles brewer's spent grain                               | 6.61                       | $\text{CdSO}_4 \cdot \text{H}_2\text{O}$  | 5,5                     | 3,33       | 24 h, 23 °C   | This work |
| Wheat beer brewer's spent grain                           | 11.40                      | $\text{CdSO}_4 \cdot \text{H}_2\text{O}$  | 5,5                     | 3,33       | 24 h, 25 °C   | This work |
| H-Ch60-2                                                  | 195.6                      | $\text{CdSO}_4 \cdot \text{H}_2\text{O}$  | 5.5                     | 3.33       | 24 h, 25 °C   | [21]      |
| Oxidized potato starch                                    | 7.9                        | $\text{CdSO}_4 \cdot \text{H}_2\text{O}$  | 6.1                     | 2          | 2 h, 25 °C    | [22]      |
| Oxidized corn starch                                      | 7.7                        | $\text{CdSO}_4 \cdot \text{H}_2\text{O}$  | 6.1                     | 2          | 2 h, 25 °C    | [22]      |
| Native potato starch                                      | 1.6                        | $\text{CdSO}_4 \cdot \text{H}_2\text{O}$  | 6.1                     | 2          | 2 h, 25 °C    | [22]      |
| Aminopyridine modified poly(styrene-alt-maleic anhydride) | 81.30                      | $\text{CdSO}_4 \cdot \text{H}_2\text{O}$  | 5                       | 2.5        | 60 min, 25 °C | [23]      |
| Ficus religiosa Leaf Powder                               | 27.14                      | $\text{CdSO}_4 \cdot 8\text{H}_2\text{O}$ | 5                       | -          | 30 min, 30 °C | [24]      |
| Carbon prepared from apricot stone                        | 33.57                      | $\text{CdSO}_4 \cdot 8\text{H}_2\text{O}$ | 6                       | 2          | 48 h, 25 °C   | [25]      |
| Biomass xanthates                                         | 19.6                       | $\text{CdCl}_2$                           | 6 - 8                   | 0.20       | 2 h, 20 °C    | [26]      |
| Graphene oxide / starch composite                         | 29.04                      | n.a.                                      | n.a.                    | 2.5        | 2 h, 25 °C    | [27]      |
| Crosslinked carboxymethyl starch (CCS)                    | 47                         | $\text{CdCl}_2$                           | 6                       | 50         | 1 h, 25 °C    | [27]      |
| Chitosan-thiourea hydrogel                                | 156                        | $\text{CdSO}_4$                           | 5.6                     | 0.5        | 24 h, 25 °C   | [28]      |
| Chitosan                                                  | 160                        | $\text{CdCl}_2$                           | 7                       | 1          | 24 h, 25 °C   | [29]      |
| Chitosan-based hydrogel                                   | 234.83                     | $\text{Cd}(\text{NO}_3)_2$                | 6.0                     | 2          | 24 h, 40 °C   | [30]      |
| Activated carbon/ Fe/ chitosan hybrid                     | 344                        | $\text{Cd}(\text{NO}_3)_2$                | 6.0                     | 10         | 24 h, 25 °C   | [31]      |

### 3 References

1. Su, Y.; Böhm, W.; Wenzel, M.; Paasch, S.; Acker, M.; Doert, T.e.a. Mild hydrothermally treated brewer's spent grain for efficient removal of uranyl and rare earth metal ions. *RSC Advances* **2020**, *10*, 45116–45129, doi:10.1039/D0RA08164G.
2. Izinyon, O.C.; Nwosu, O.E.; Lo Akhigbe; Ilaboya, I.R. Performance Evaluation of Fe (III) Adsorption onto Brewers' Spent Grain. *Nigerian Journal of Technology* **2016**, *35*, S. 970–978, doi:10.4314/njt.v35i4.36.
3. Khidzir K.M; Noorlidah Abdullah; Agamuthu P. Brewery Spent Grain: Chemical Characteristics and utilization as an Enzyme Substrate. *Malaysian Journal of Science* **2010**, *29*, S. 41–51, doi:10.22452/mjs.vol29no1.7.
4. Fontana, I.B.; Peterson, M.; Cechinel, M.A.P. Application of brewing waste as biosorbent for the removal of metallic ions present in groundwater and surface waters from coal regions. *Journal of Environmental Chemical Engineering* **2018**, *6*, 660–670, doi:10.1016/j.jece.2018.01.005.
5. Akinpelu, E.A.; Fosso-Kankeu, E.; Waander, F. Biosorption of Fe (II) from aqueous solution by brewing waste: Equilibrium and kinetic studies. *Journal of Water and Environment Technology* **2019**, *17*, S. 180–193, doi:10.2965/jwet.18-081.
6. Charazińska, S.; Lochyński, P.; Burszta-Adamiak, E. Removal of heavy metal ions from acidic electrolyte for stainless steel electropolishing via adsorption using Polish peats. *Journal of Water Process Engineering* **2021**, *42*, 102169, doi:10.1016/j.jwpe.2021.102169.
7. Weißpflog, J.; Gündel, A.; Vehlow, D.; Steinbach, C.; Müller, M.; Boldt, R.e.a. Solubility and Selectivity Effects of the Anion on the Adsorption of Different Heavy Metal Ions onto Chitosan. *Molecules (Basel, Switzerland)* **2020**, doi:10.3390/molecules25112482.
8. Ahmad, A.; Bhat, A.H.; Buang, A. Biosorption of transition metals by freely suspended and Ca-alginate immobilised with *Chlorella vulgaris*: Kinetic and equilibrium modeling. *Journal of Cleaner Production* **2018**, 1361–1375, doi:10.1016/j.jclepro.2017.09.252.
9. Moreno-Piraján, J.C.; Garcia-Cuello, V.S.; Giraldo, L. The removal and kinetic study of Mn, Fe, Ni and Cu ions from wastewater onto activated carbon from coconut shells. *Adsorption* **2010**, 505–514, doi:10.1007/s10450-010-9311-5.

10. Moreno, J.C.; Gómez, R.; Giraldo, L. Removal of Mn, Fe, Ni and Cu Ions from Wastewater Using Cow Bone Charcoal. *Materials* **2010**, 452–466, doi:10.3390/ma3010452.
11. Wierzba, S.; Kłos, A. Heavy metal sorption in biosorbents – Using spent grain from the brewing industry. *Journal of Cleaner Production* **2019**, 225, 112–120, doi:10.1016/j.jclepro.2019.03.286.
12. Esfandiar, N.; Nasernejad, B.; Ebadi, T. Removal of Mn(II) from groundwater by sugarcane bagasse and activated carbon (a comparative study): Application of response surface methodology (RSM). *Journal of Industrial and Engineering Chemistry* **2014**, 20, 3726–3736, doi:10.1016/j.jiec.2013.12.072.
13. Vaghetti, J.C.P.; Lima, E.C.; Royer, B.; Da Cunha, B.M.; Cardoso, N.F.; Brasil, J.L.; Dias, S.L.P. Pecan nutshell as biosorbent to remove Cu(II), Mn(II) and Pb(II) from aqueous solutions. *Journal of hazardous materials* **2009**, 162, 270–280, doi:10.1016/j.jhazmat.2008.05.039.
14. Veglió, F.; Beolchini, F.; Gasbarro, A. Biosorption of toxic metals: an equilibrium study using free cells of *Arthrobacter* sp. *Process Biochemistry* **1997**, 32, 99–105, doi:10.1016/S0032-9592(96)00047-7.
15. Fernández-González, R.; Martín-Lara, M.A.; Iáñez-Rodríguez, I.; Calero, M. Removal of heavy metals from acid mining effluents by hydrolyzed olive cake. *Bioresource Technology* **2018**, 268, 169–175, doi:10.1016/j.biortech.2018.07.124.
16. Anguile, J.J.; Ona-Mbega, M.; Makani, T.; Ketcha-Mbadcam, J. Adsorption of manganese (II) ions from aqueous solution on to volcanic ash and geopolymer based volcanic ash. *International Journal of Basic and Applied Chemical Sciences* **2013**, 7–18.
17. Kara, I.; Tunc, D.; Sayin, F.; Akar, S.T. Study on the performance of metakaolin based geopolymer for Mn(II) and Co(II) removal. *Applied Clay Science* **2018**, 184–193, doi:10.1016/j.clay.2018.04.027.
18. Yang, X.; Zhou, T.; Ren, B.; Hursthouse, A.; Zhang, Y. Removal of Mn (II) by Sodium Alginate/Graphene Oxide Composite Double-Network Hydrogel Beads from Aqueous Solutions. *Sci Rep* **2018**, 10717, doi:10.1038/s41598-018-29133-y.
19. Kemik, Ö.; Ngwabebhoh, F.A.; Yildiz, U. A response surface modelling study for sorption of Cu<sup>2+</sup>, Ni<sup>2+</sup>, Zn<sup>2+</sup> and Cd<sup>2+</sup> using chemically modified poly(vinylpyrrolidone) and poly(vinylpyrrolidone-co-methylacrylate) hydrogels.

- Adsorption Science & Technology* **2016**, 263–283, doi:10.1177/0263617416674950.
20. Wu, F.-C.; Tseng, R.-L.; Juang, R.-S. A review and experimental verification of using chitosan and its derivatives as adsorbents for selected heavy metals. *Journal of Environmental Management* **2010**, 798–806.
  21. Reis, B.; Gerlach, N.; Steinbach, C.; Haro Carrasco, K.; Oelmann, M.; Schwarz S.; Müller, M.; Schwarz D. A Complementary and Revised View on the N-Acylation of Chitosan with Hexanoyl Chloride. *Marine Drugs* **2021**, doi:10.3390/md19070385.
  22. Borchert, K.; Boughanmi, R.; Reis, B.; Zimmermann, P.; Steinbach, C.; Graichen, P.; Svirepa, A.; Schwarz, J.; Boldt, R.; Schwarz, S.; et al. Removal of Lead, Cadmium, and Aluminum Sulfate from Simulated and Real Water with Native and Oxidized Starches. *Polysaccharides* **2021**, 429–453, doi:10.3390/polysaccharides2020027.
  23. Rao, K.S.; Anand, S.; Venkateswarlu, P. Adsorption of Cadmium from Aqueous Solution by Ficus religiosa Leaf Powder and Characterization of Loaded Biosorbent. *Clean Soil Air Water* **2011**, 384–391, doi:10.1002/clen.201000098.
  24. Kobya, M.; Demirbas, E.; Senturk, E.; Ince, M. Adsorption of heavy metal ions from aqueous solutions by activated carbon prepared from apricot stone. *Bioresour. Technol* **2005**, 1518–1521, doi:10.1016/j.biortech.2004.12.005.
  25. Li, W.; Liao, X.; Wang, L.; Huang, Z. Adsorption of cadmium and lead in wastewater by four kinds of biomass xanthates. *Water Sci. Technol* **2019**, 1222–1230, doi:10.2166/wst.2019.124.
  26. Wang, Z.; Zhang, X.; Wu, X.; Yu, J.-G.; Jiang, X.-Y.; Wu, Z.-L.; Hao, X. Soluble starch functionalized graphene oxide as an efficient adsorbent for aqueous removal of Cd(II): The adsorption thermodynamic, kinetics and isotherms. *J Sol-Gel Sci Technol* **2017**, 440–449, doi:10.1007/s10971-017-4313-3.
  27. Chen, Y.X.; Zhong, B.H.; Fang, W. Adsorption characterization of lead(II) and cadmium(II) on crosslinked carboxymethyl starch. *J. Appl. Polym. Sci.* **2011**, 5010–5020, doi:10.1002/app.35607.
  28. Ghiorghita, C.-A.; Borchert, K.; Vasiliu, A.-L.; Zaharia, M.-M.; Schwarz, D.; Mihai, M. Porous thiourea-grafted-chitosan hydrogels: Synthesis and sorption of toxic metal ions from contaminated waters. *Colloids and Surfaces A: Physicochemical and Engineering Aspects* **2020**, 125504, doi:10.1016/j.colsurfa.2020.125504.

29. Dzul Erosa, M.S.; Saucedo Medina, T.I.; Navarro Mendoza, R.; Avila Rodriguez, M.; Guibal, E. Cadmium sorption on chitosan sorbents: kinetic and equilibrium studies. *Hydrometallurgy* **2001**, 157–167, doi:10.1016/S0304-386X(01)00166-9.
30. Vilela, P.; Matias, C.; Dalalibera, A.; Becegato, V.; Paulino, A. Polyacrylic Acid-Based And Chitosan-Based Hydrogels For Adsorption Of Cadmium: Equilibrium Isotherm, Kinetic And Thermodynamic Studies. *Journal of Environmental Chemical Engineering* **2019**, 103327, doi:10.1016/j.jece.2019.103327.
31. Sharififard, H.; Shahraki, Z.; Rezvanpanah, E.; Rad, S. A Novel Natural Chitosan/Activated Carbon/Iron Bio-Nanocomposite: Sonochemical Synthesis, Characterization, And Application For Cadmium Removal In Batch And Continuous Adsorption Process. *Bioresource Technology* **2018**, 562–569, doi:10.1016/j.biortech.2018.09.094.
